# Supplementary material for: Non-Targeted LC-MS/MS Assay for Screening Over 100 Lipid Mediators from ARA, EPA, and DHA in Biological Samples Based on Mass Spectral Fragmentations
Source: MDPI journal article supplement (doi:10.3390/molecules24122276), 2019-06-19

**Supplementary Material S1:** Common and specific transitions suggested for hydroxy-derivates from ARA, EPA and DHA. Product ion spectrum at  $m/z$  319 for HETEs,  $m/z$  317 for HEPEs, and  $m/z$  343 for HDoHEs were obtained from database of *LIPID MAPS* at CID 30V. No spectra was found for 19-HETE.

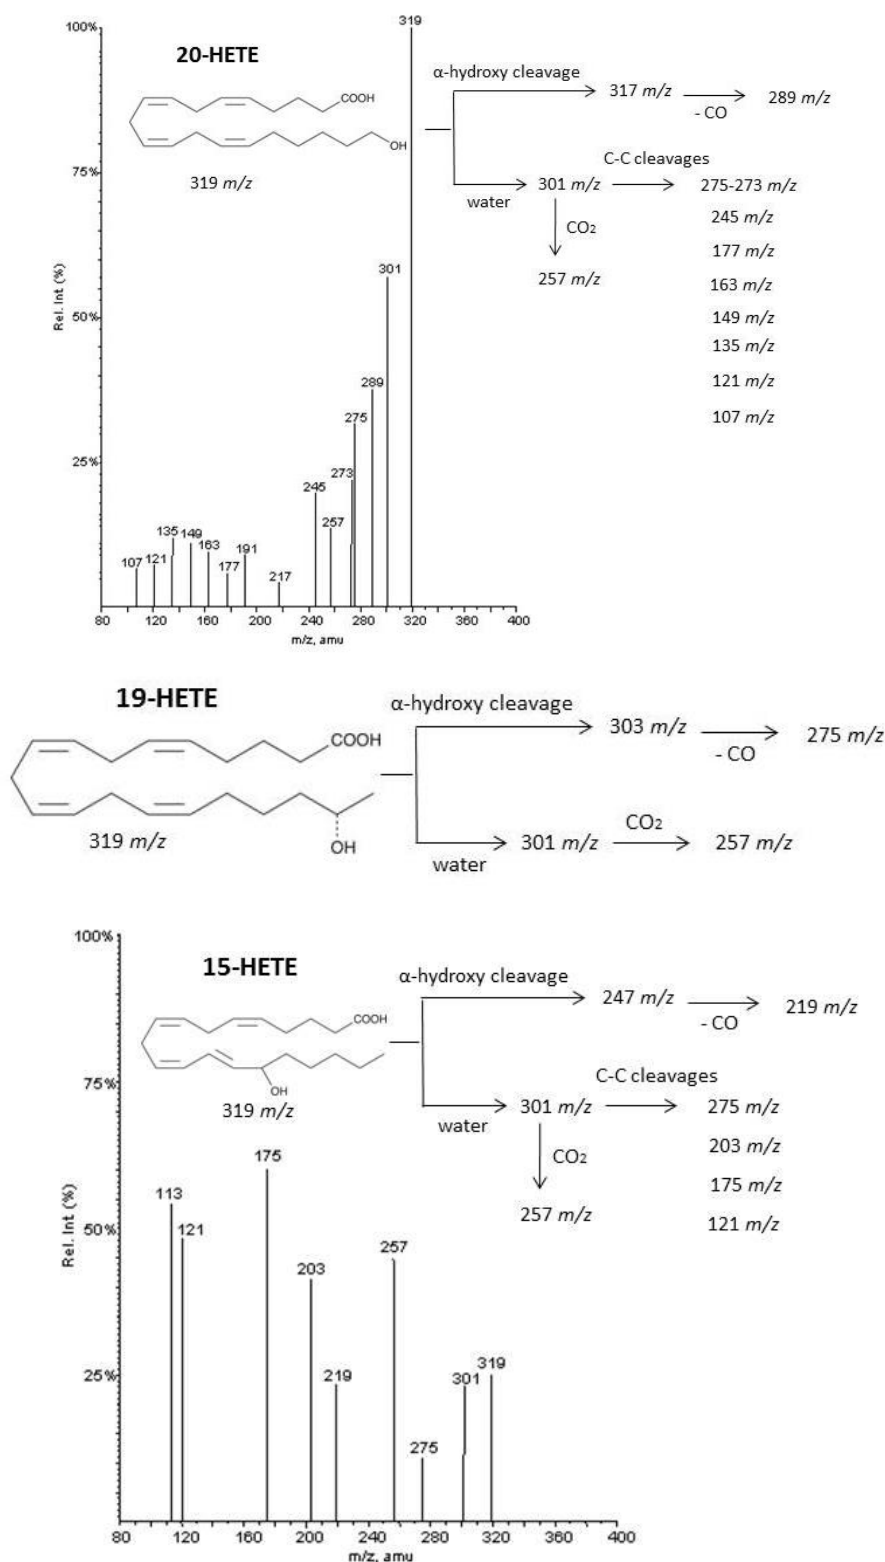

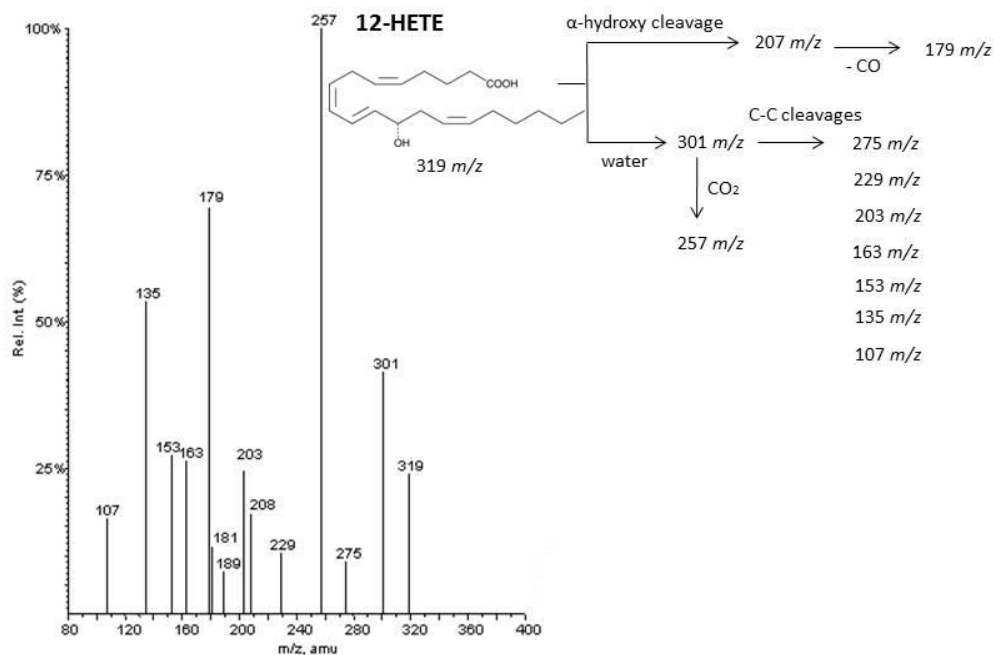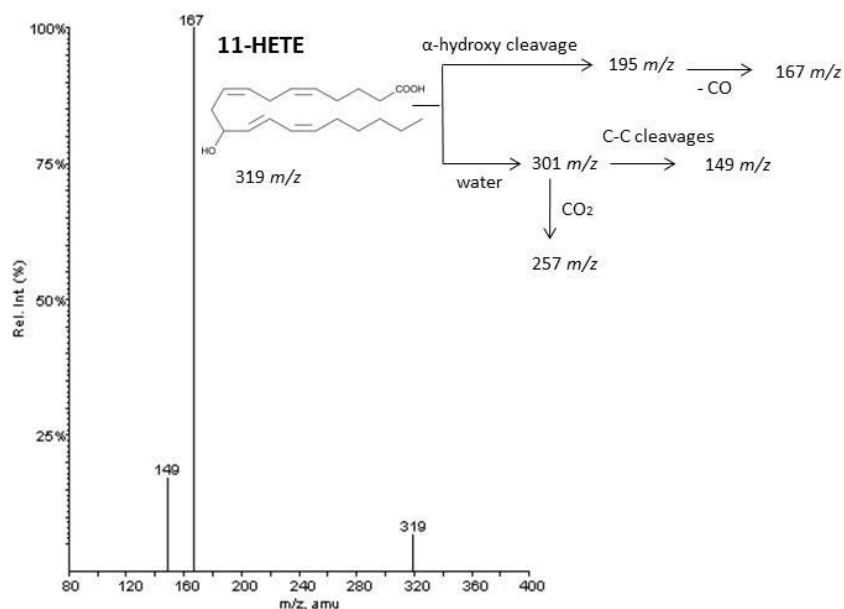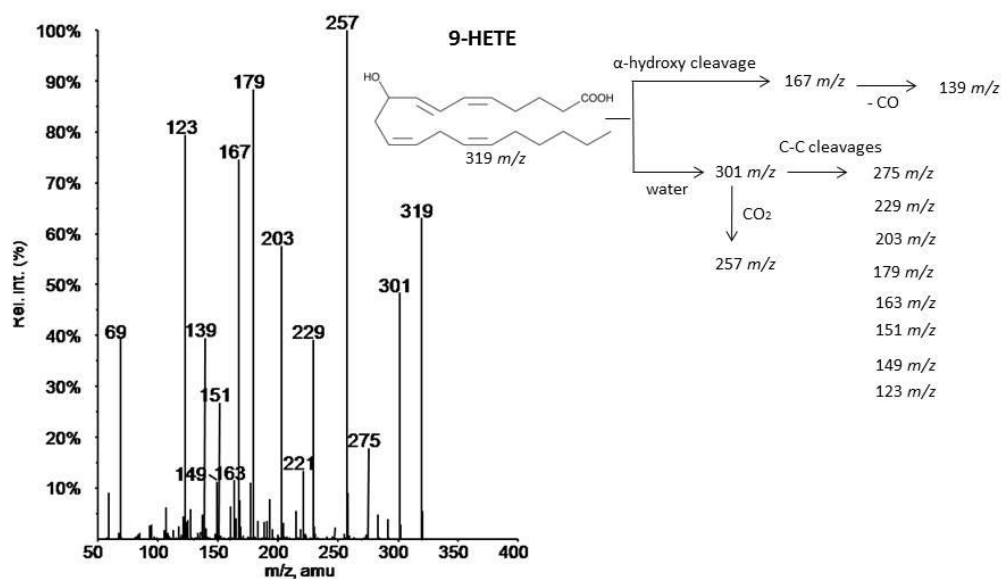

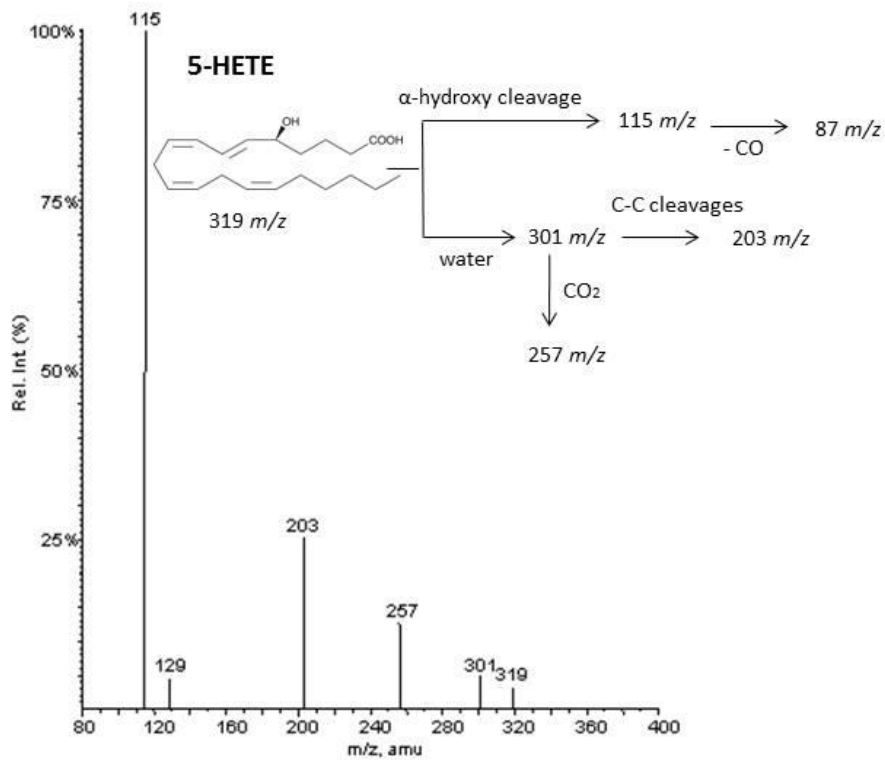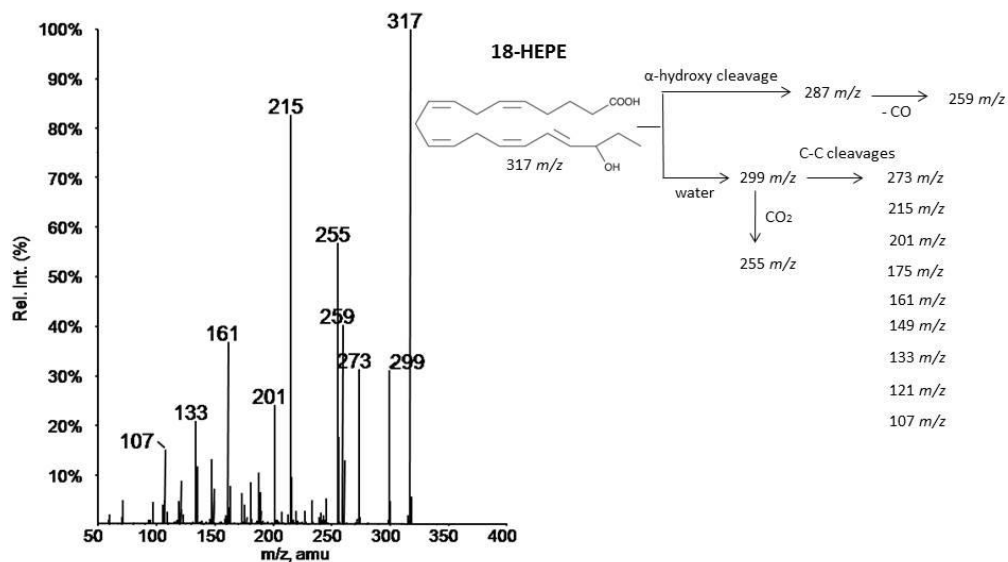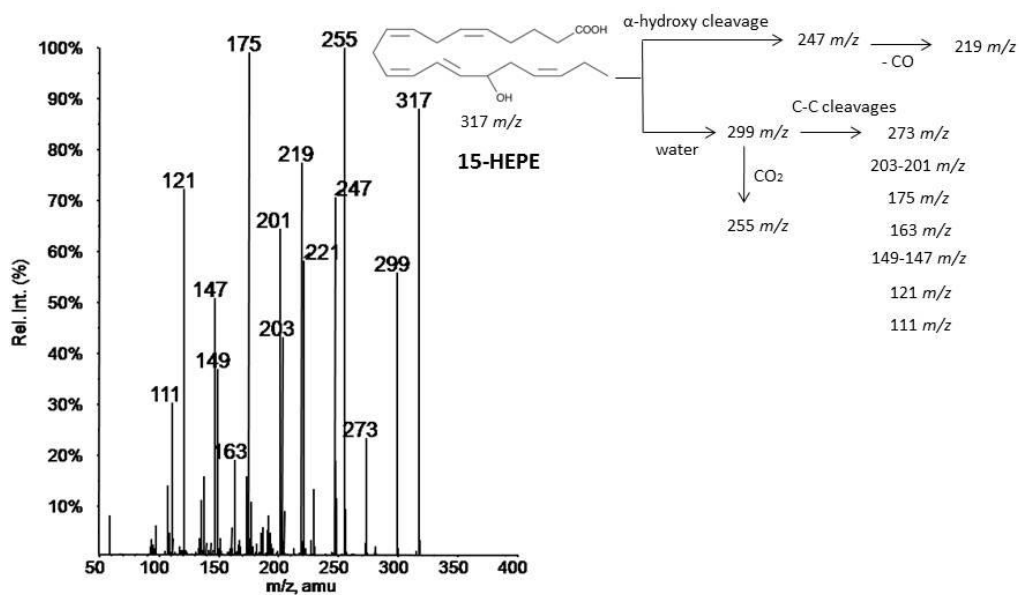

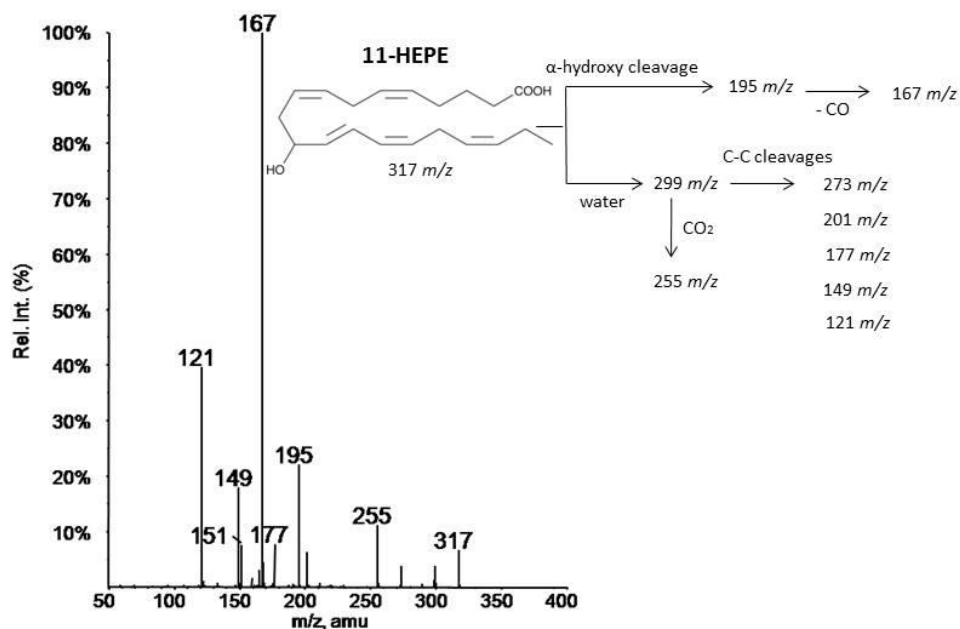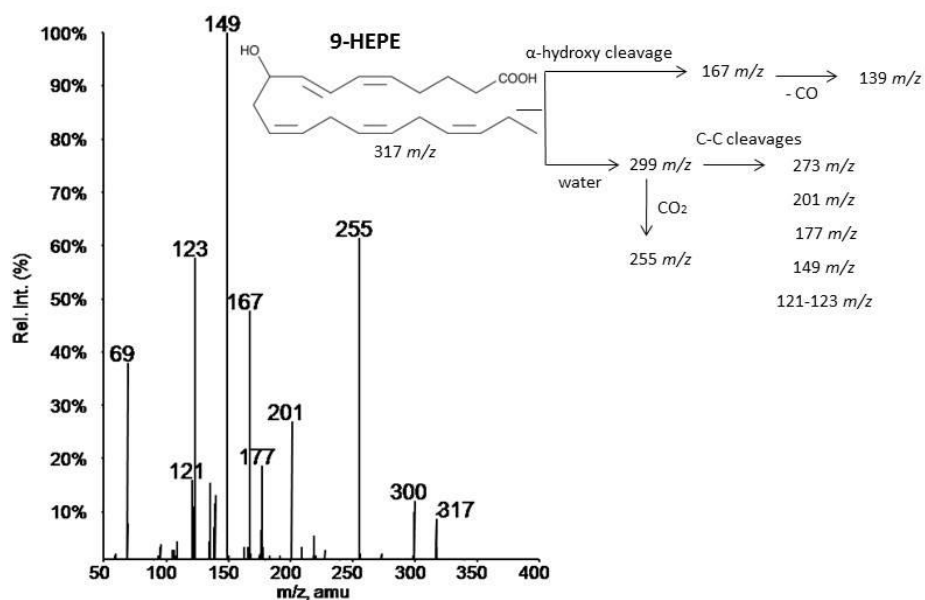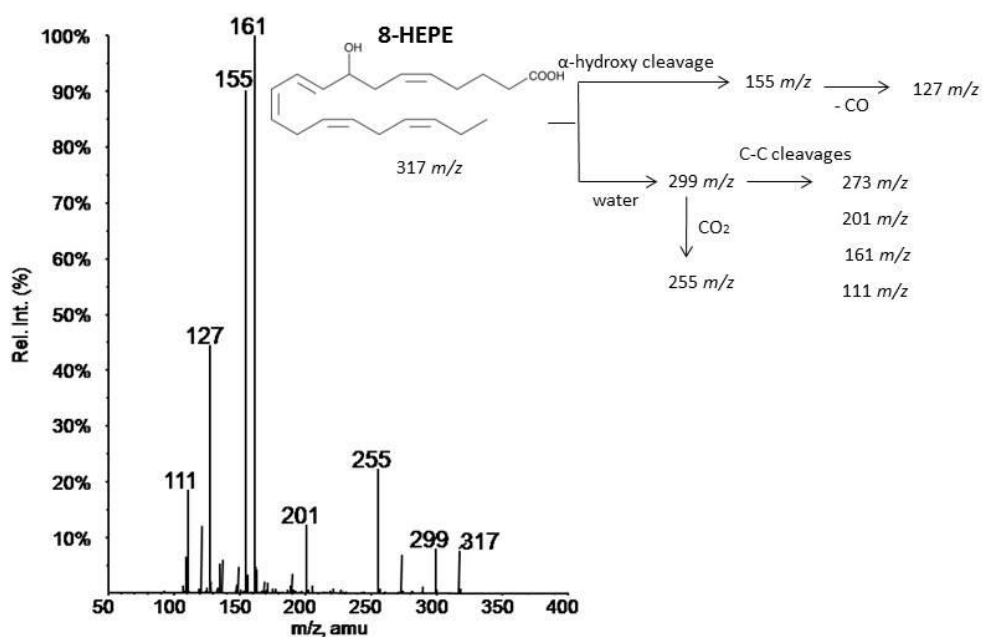

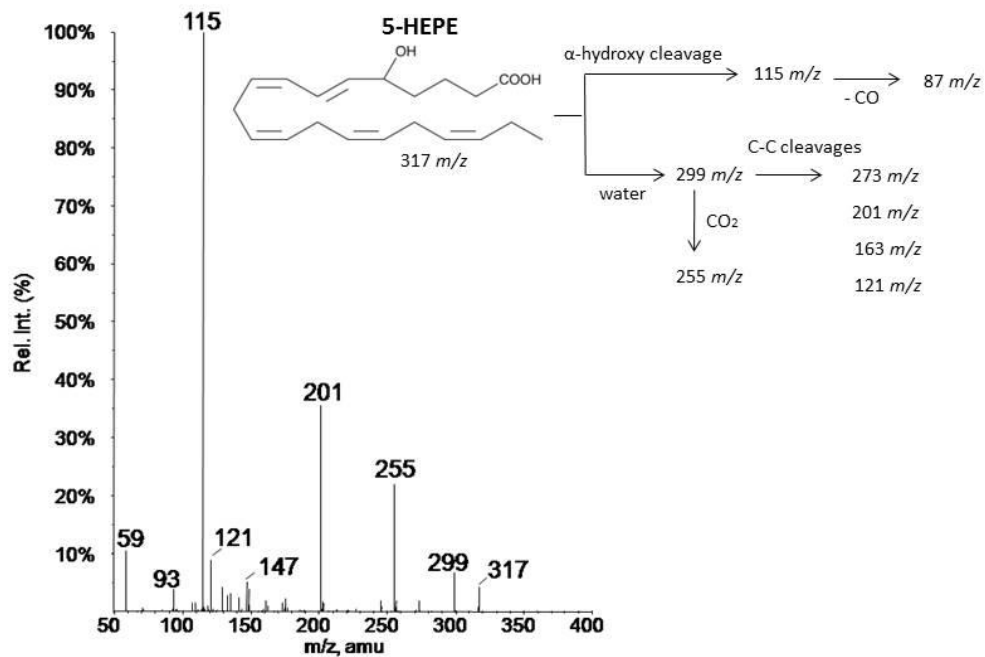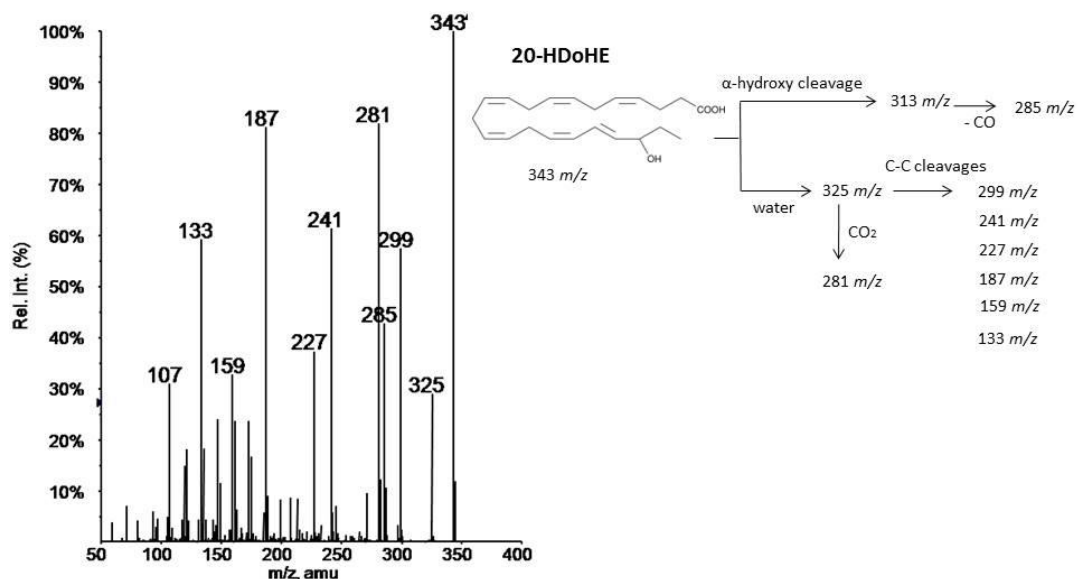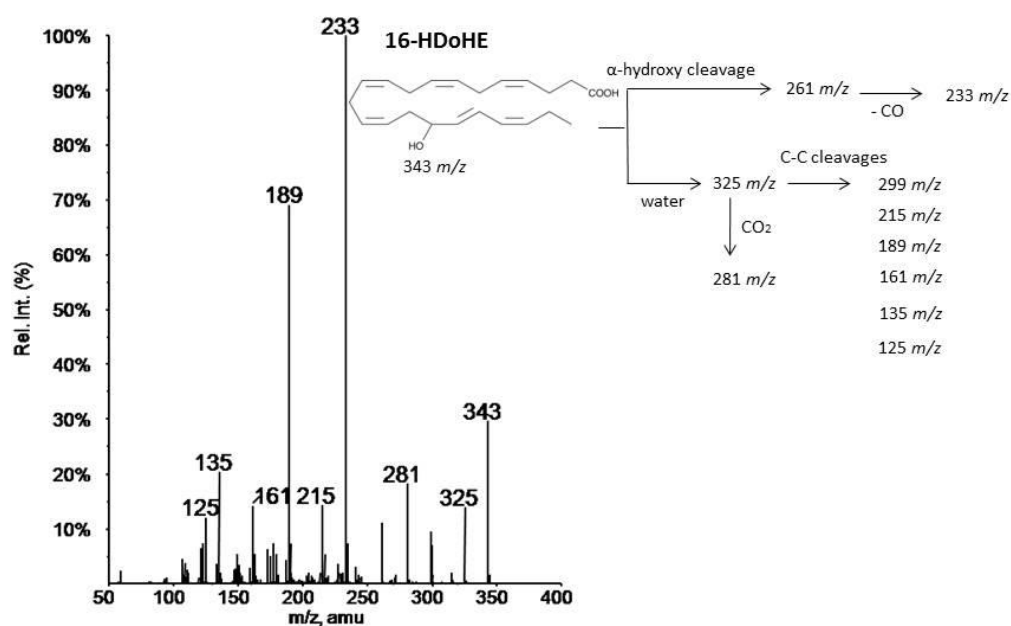

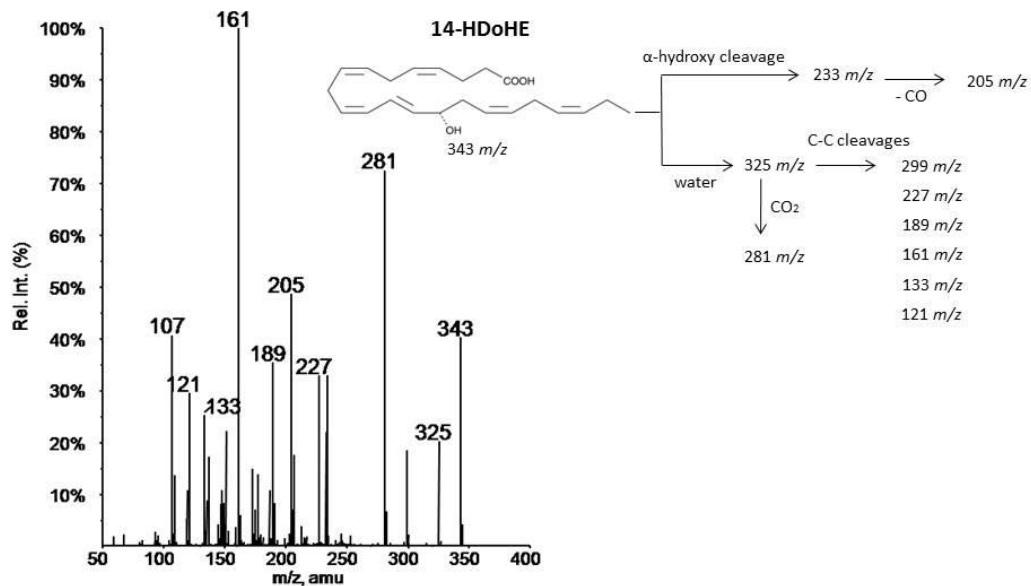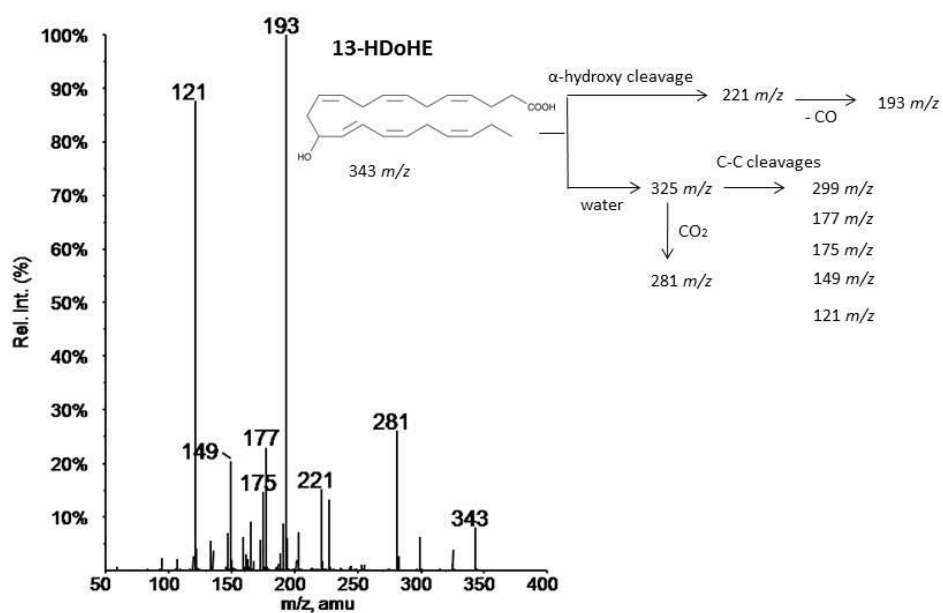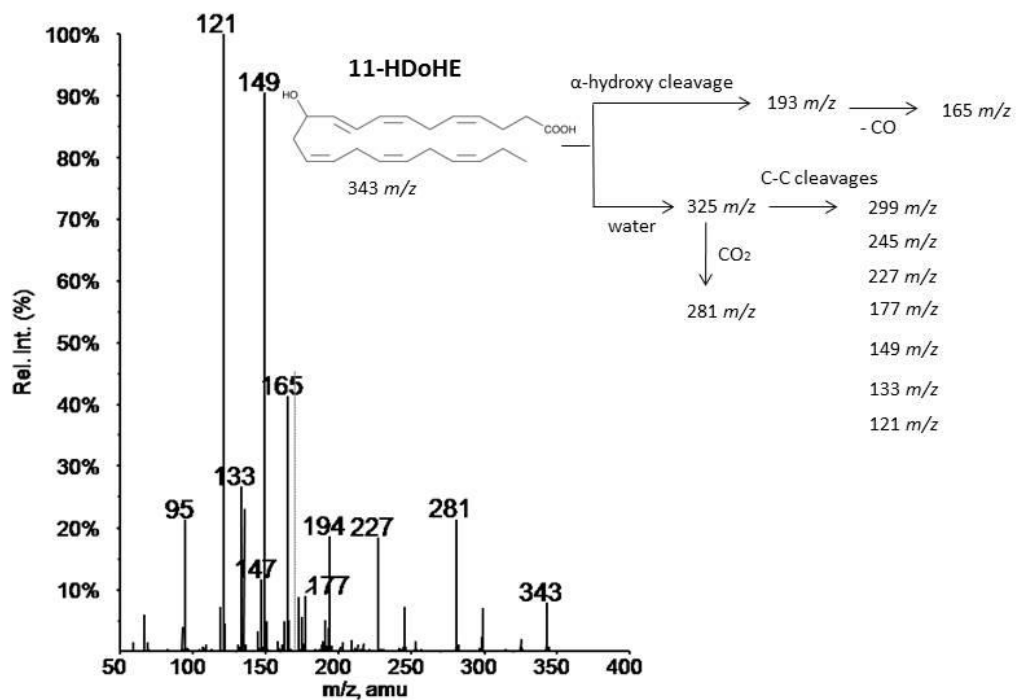

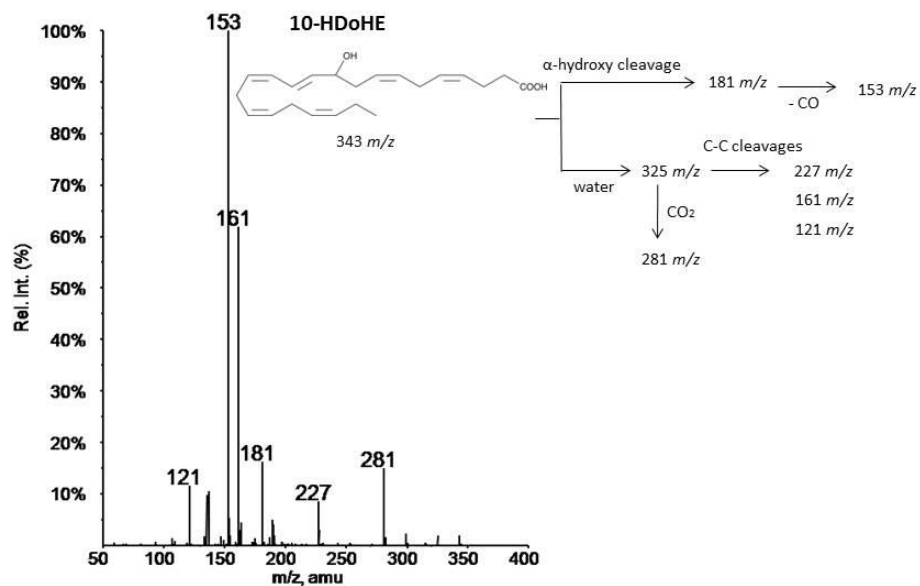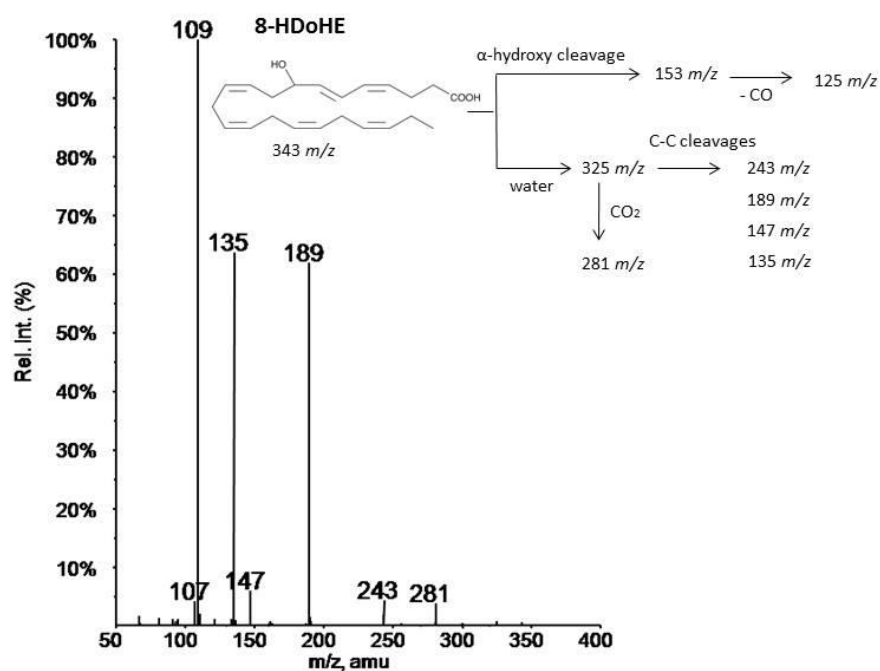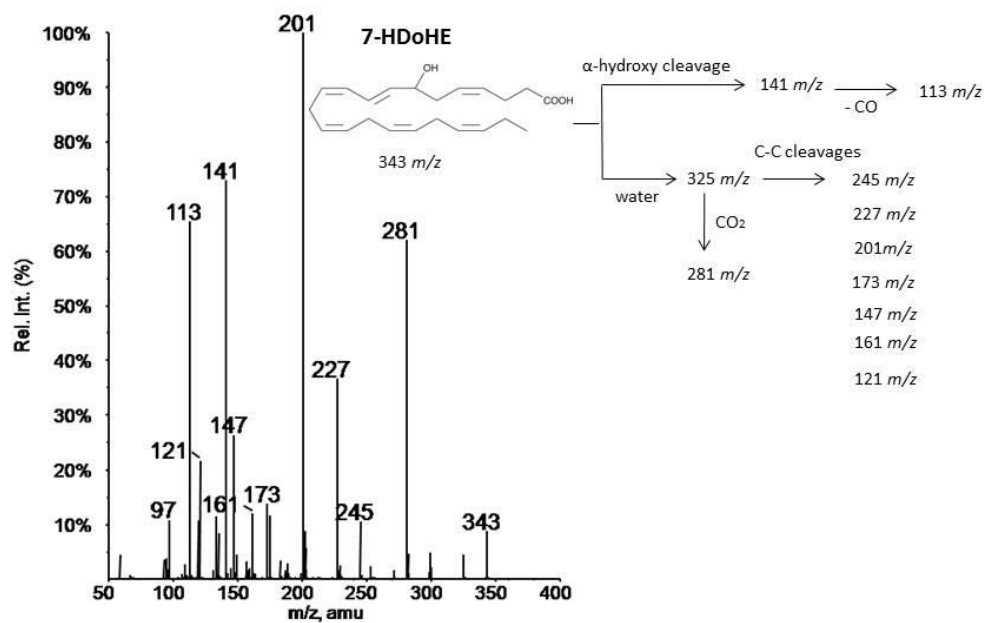

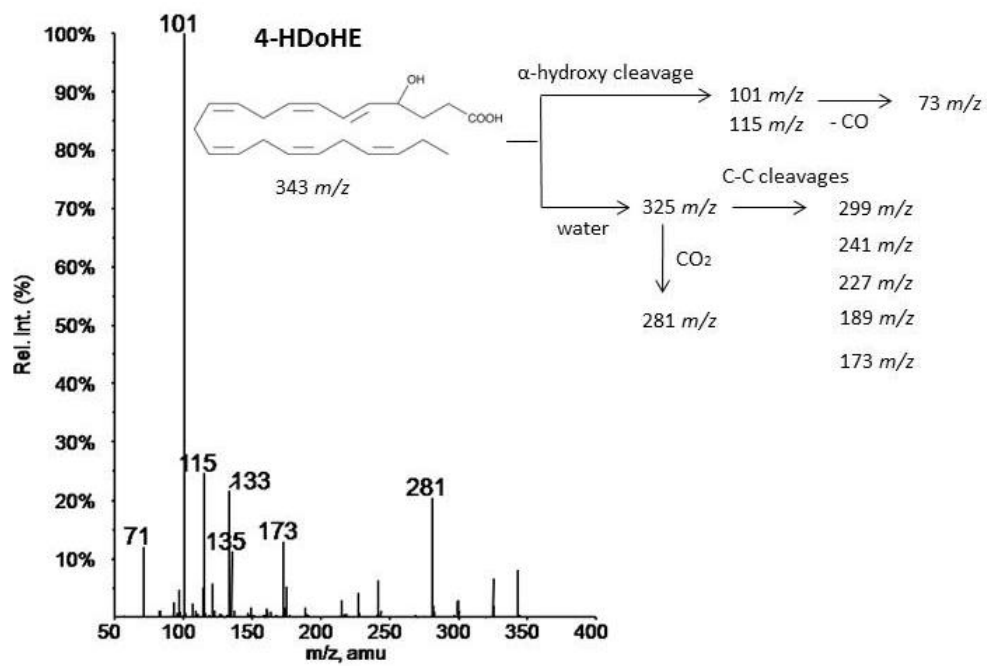



**Supplementary Material S2:** Common and specific transitions suggested for 12 and 15 hydroperoxy-derivates of ARA and EPA. Product ion spectrum at  $m/z$  335 for HpETEs, and  $m/z$  333 for HpEPEs were obtained from database of *LIPID MAPS* at CID 30V.

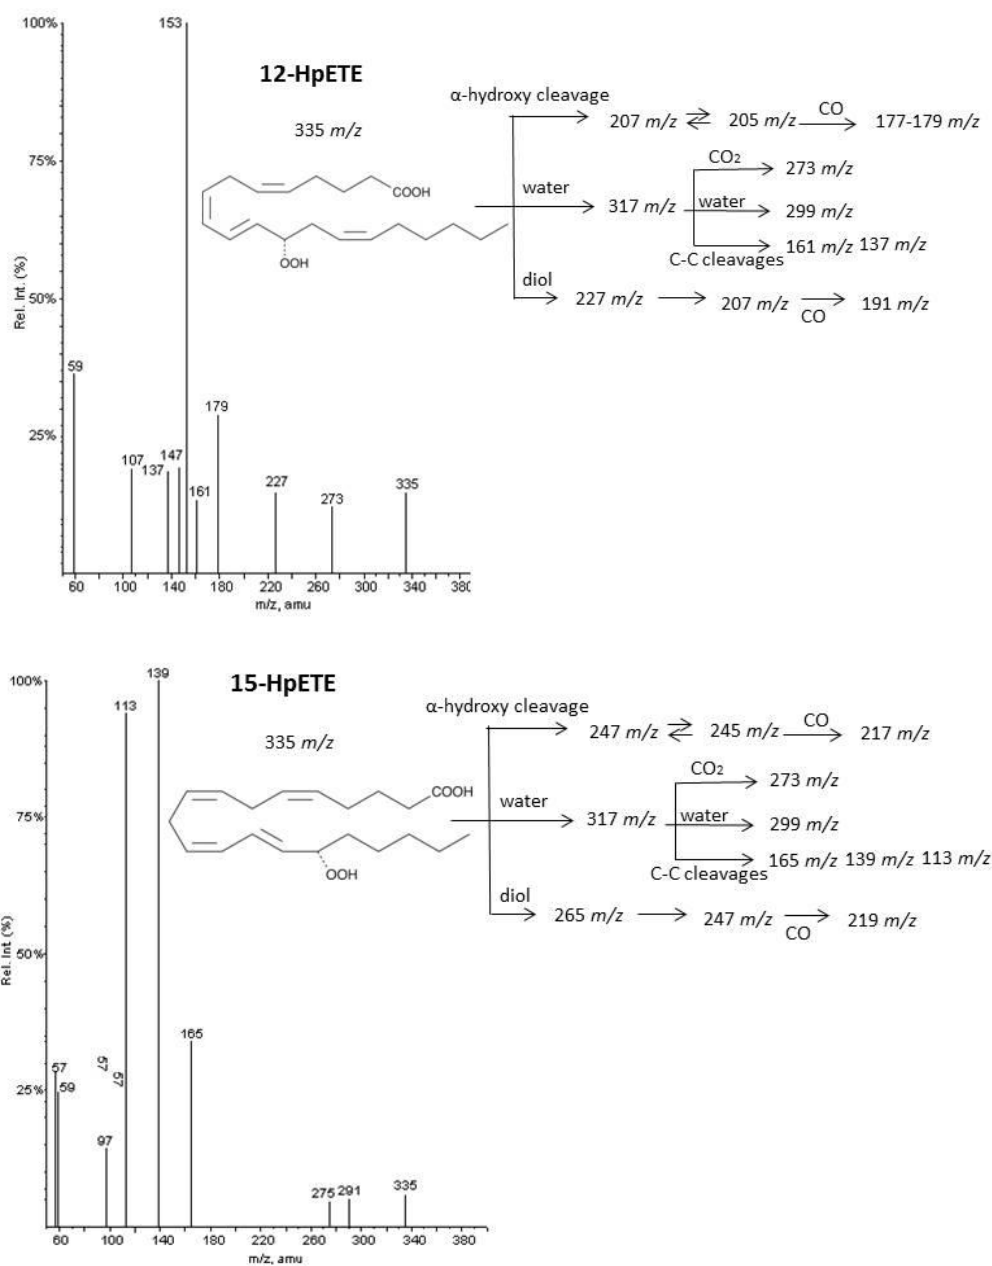

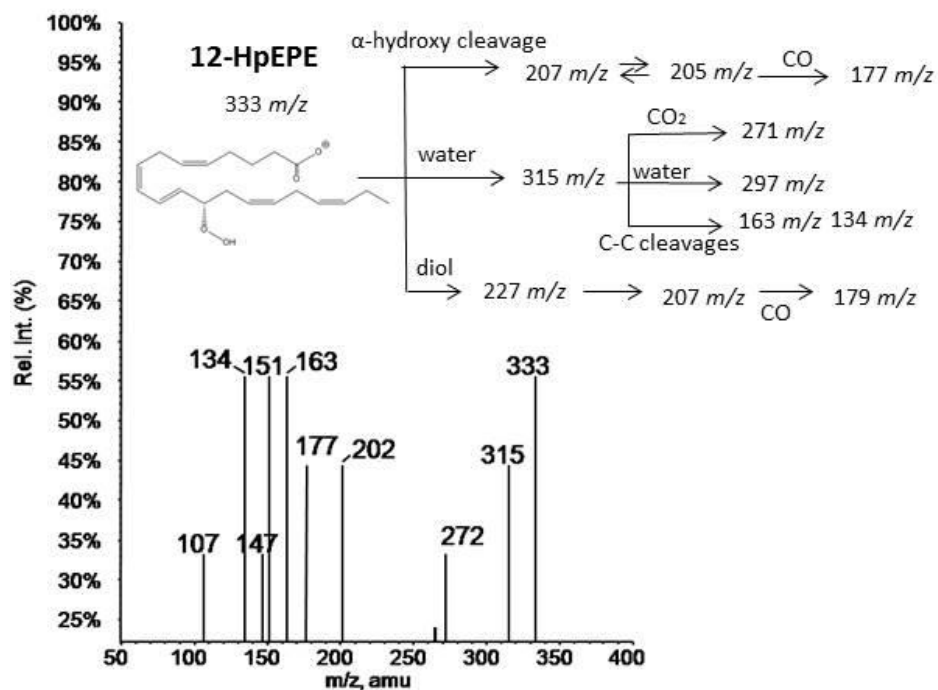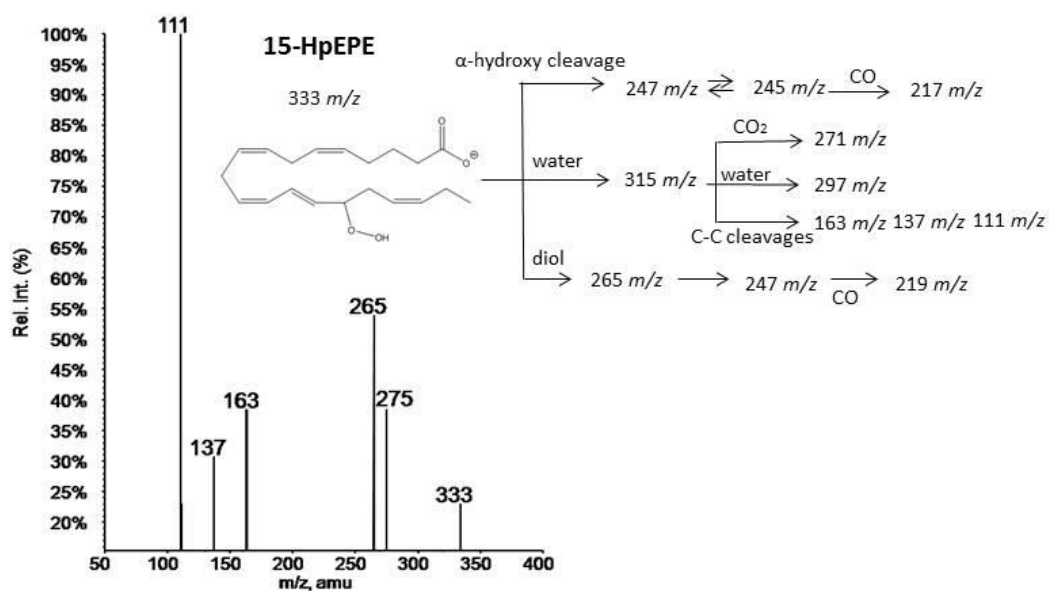

**Supplementary Materials S3:** Fragmentation pattern suggested for prostaglandins derived from ARA and EPA. Product ion spectrum at  $m/z$  331,  $m/z$  333,  $m/z$  351, and  $m/z$  367 were obtained from database of *LIPID MAPS* at CID 30V.

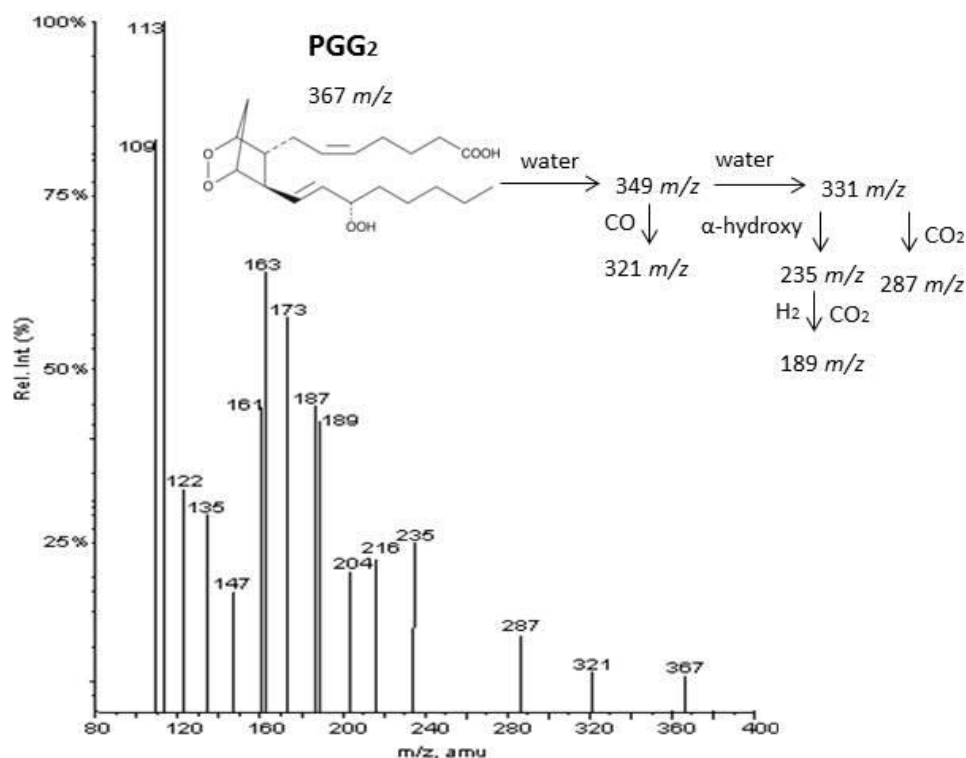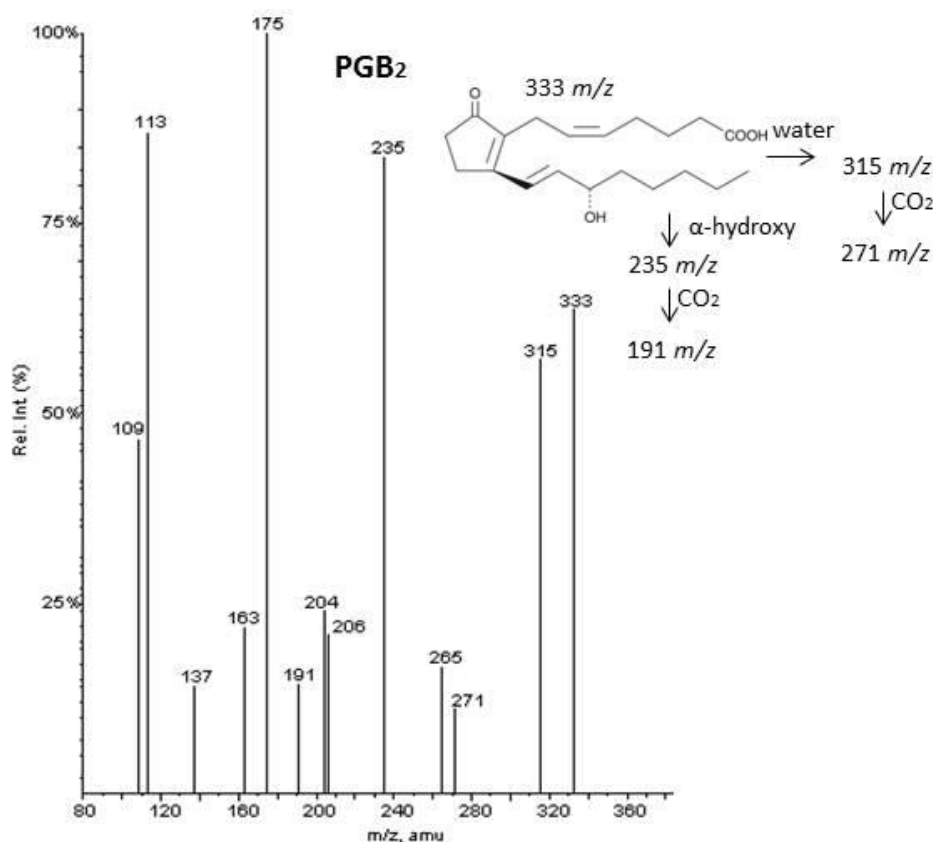

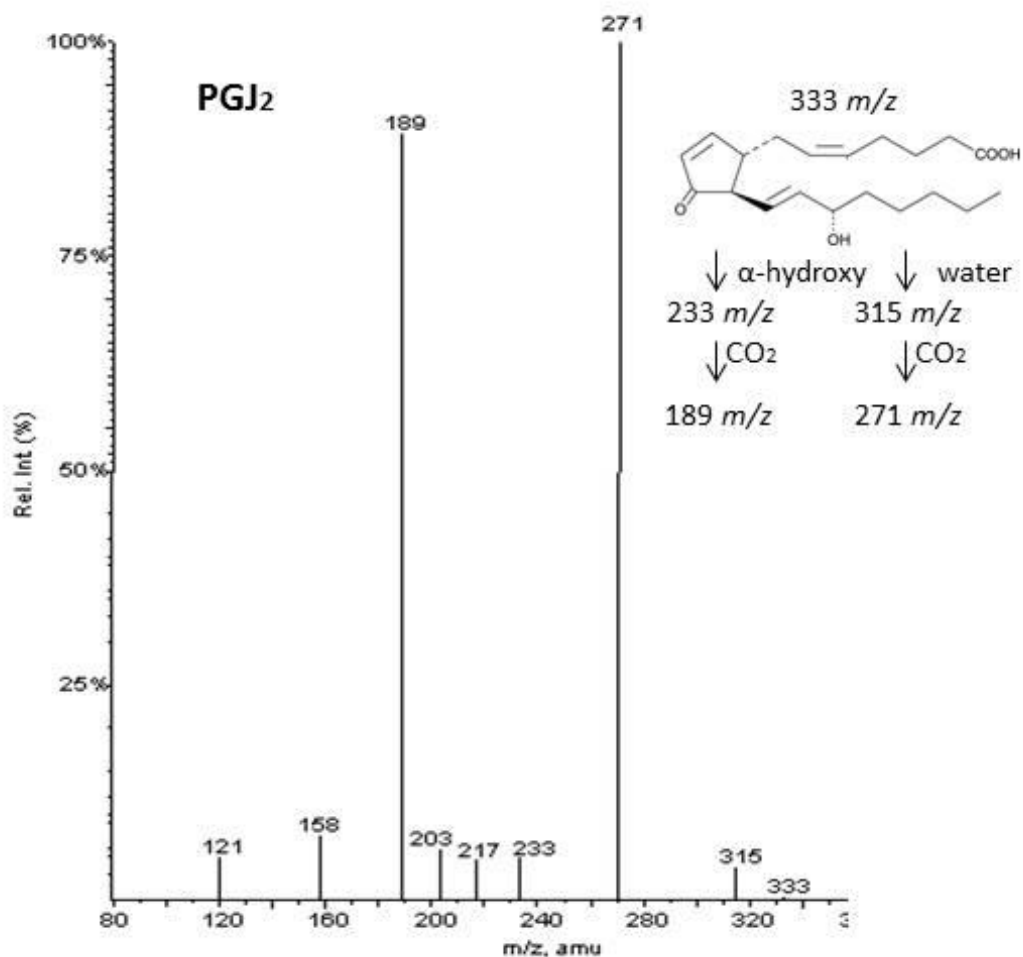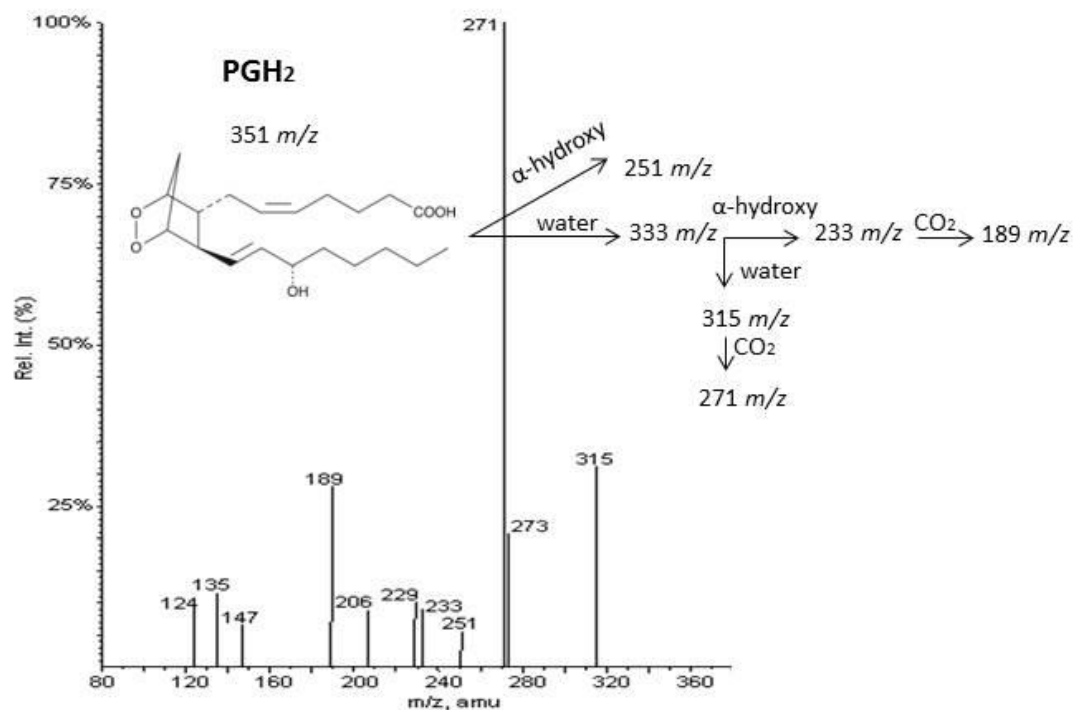

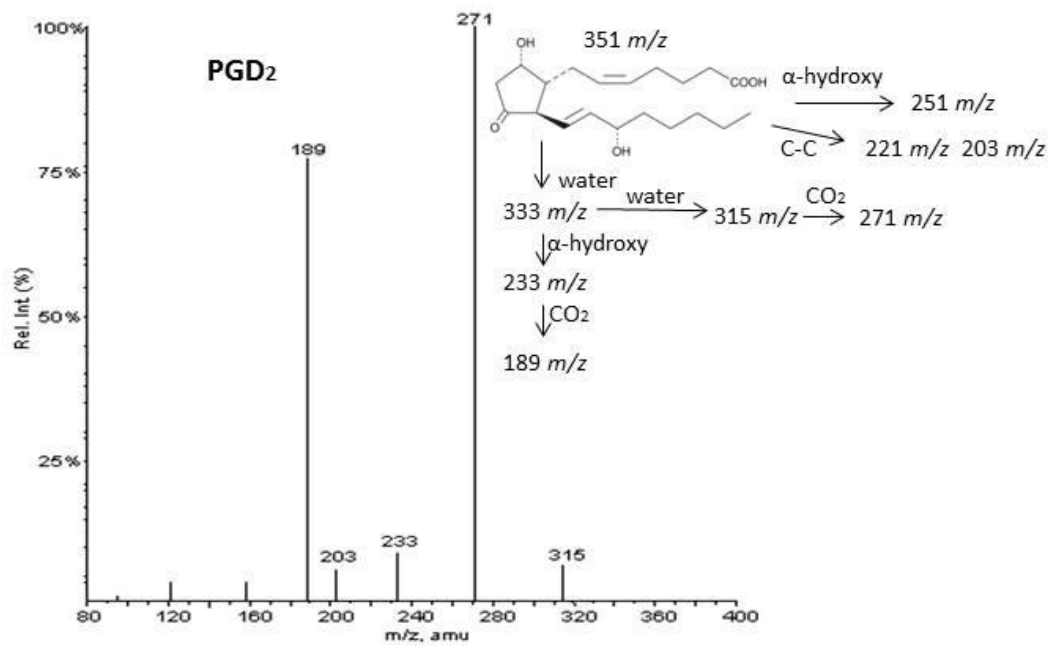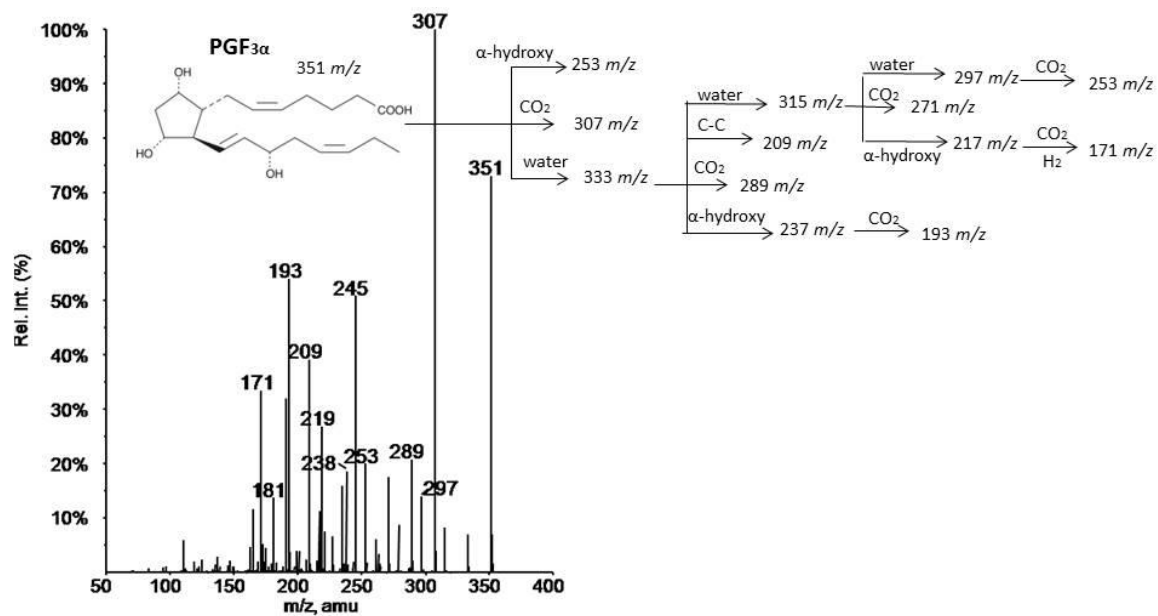

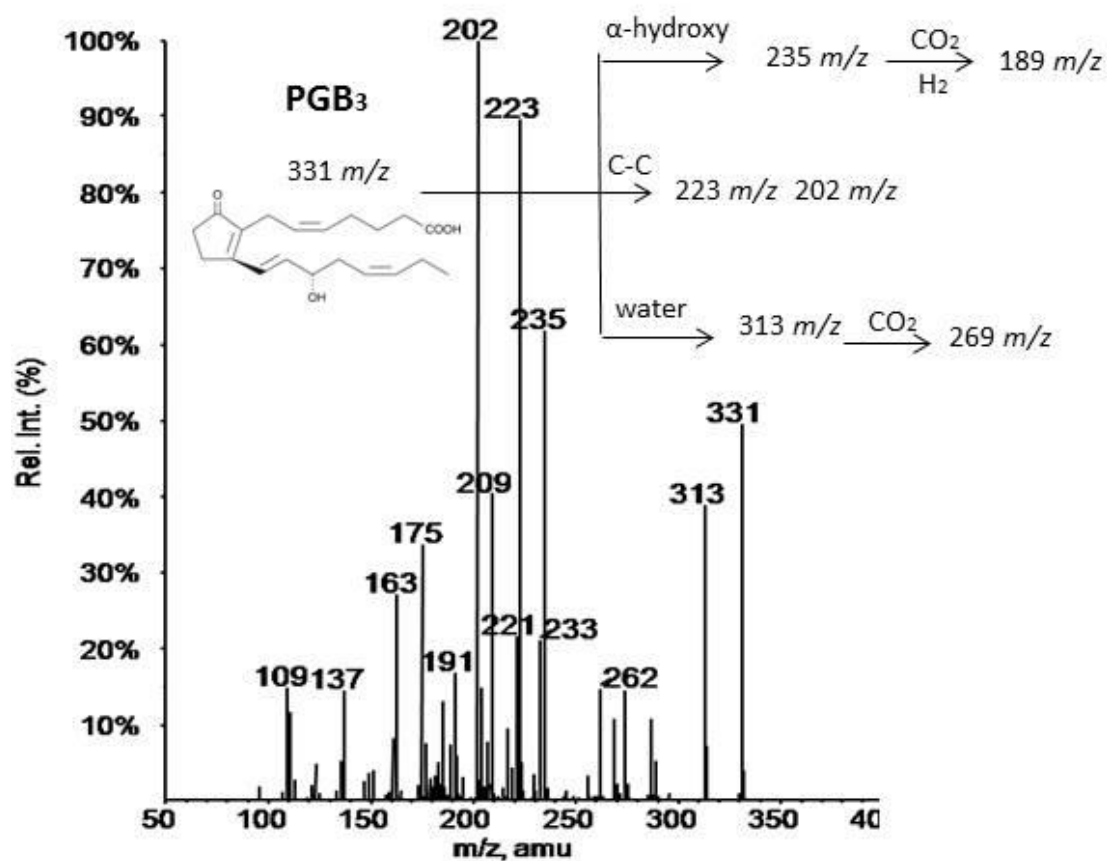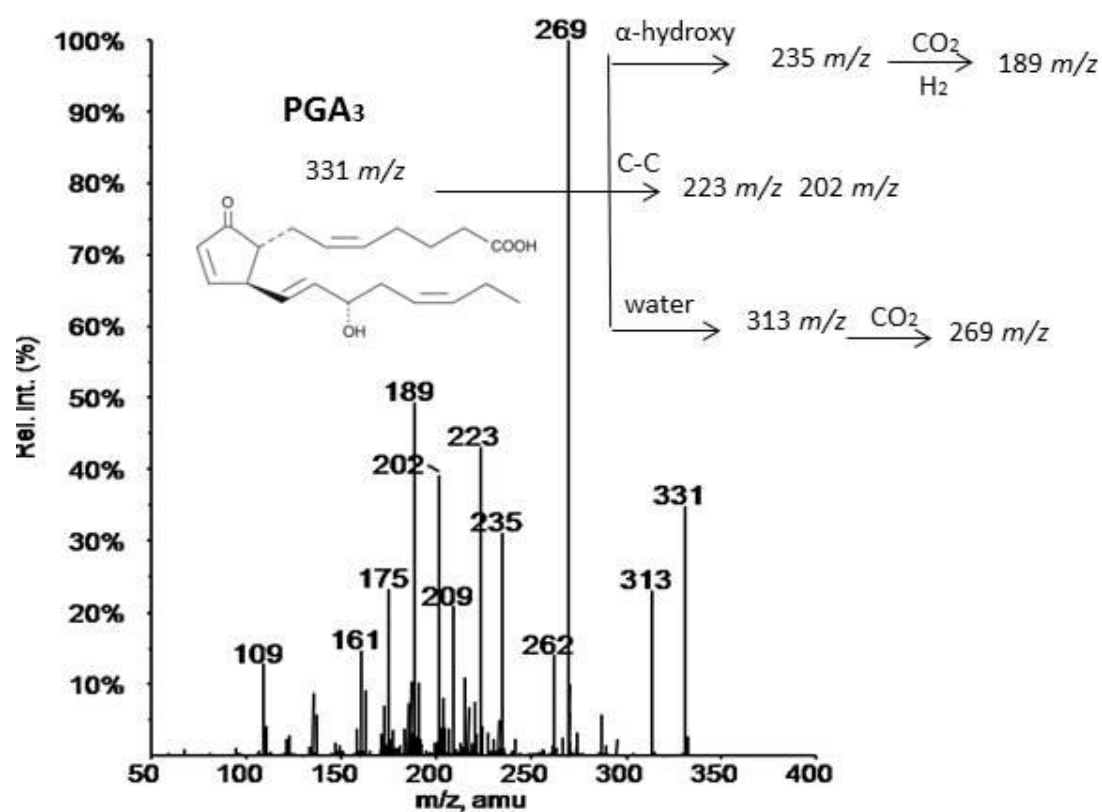

1.

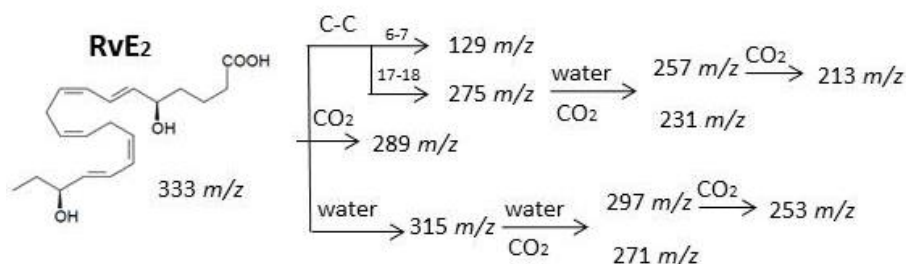

**Supplementary Materials S5:** Fragmentation pattern suggested for LxB<sub>4</sub> (product ion spectrum at  $m/z$  351 [33]), and several DiHETEs and DiHETrEs (product ion spectrum at  $m/z$  335 and  $m/z$  337 obtained from *LIPID MAPS* at CID 30V). MS/MS spectrum was not found for LxA<sub>5</sub>, 8,15-DiHETE, 14,15-DiHETE, and 17,18-DiHETE; thus, possible fragments for identification were suggested based on lipid structure.

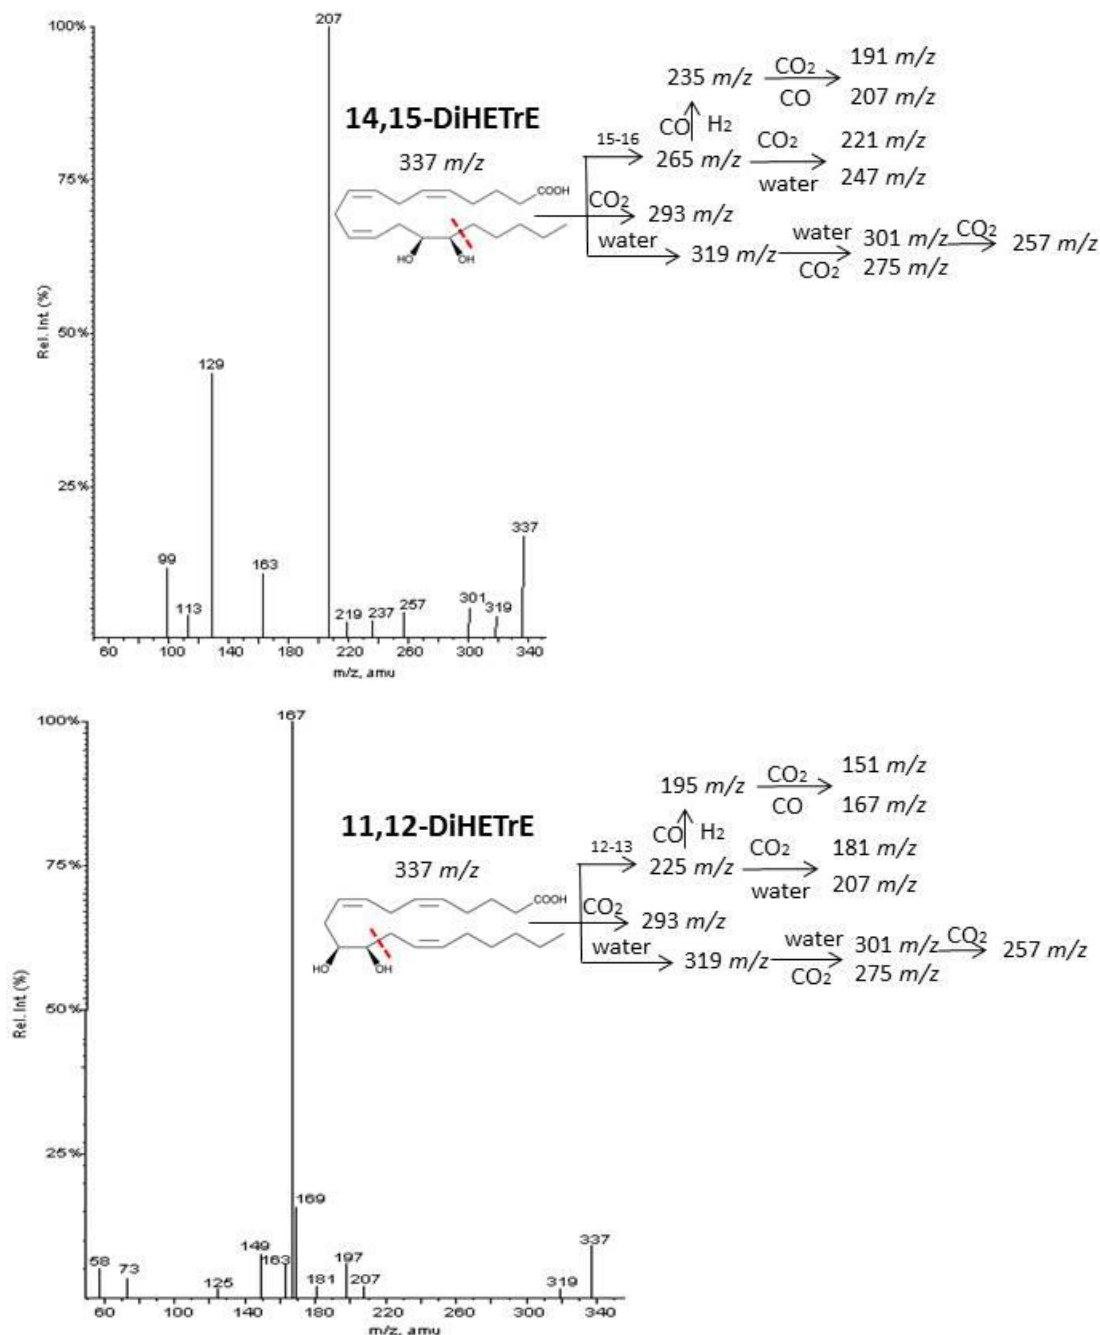



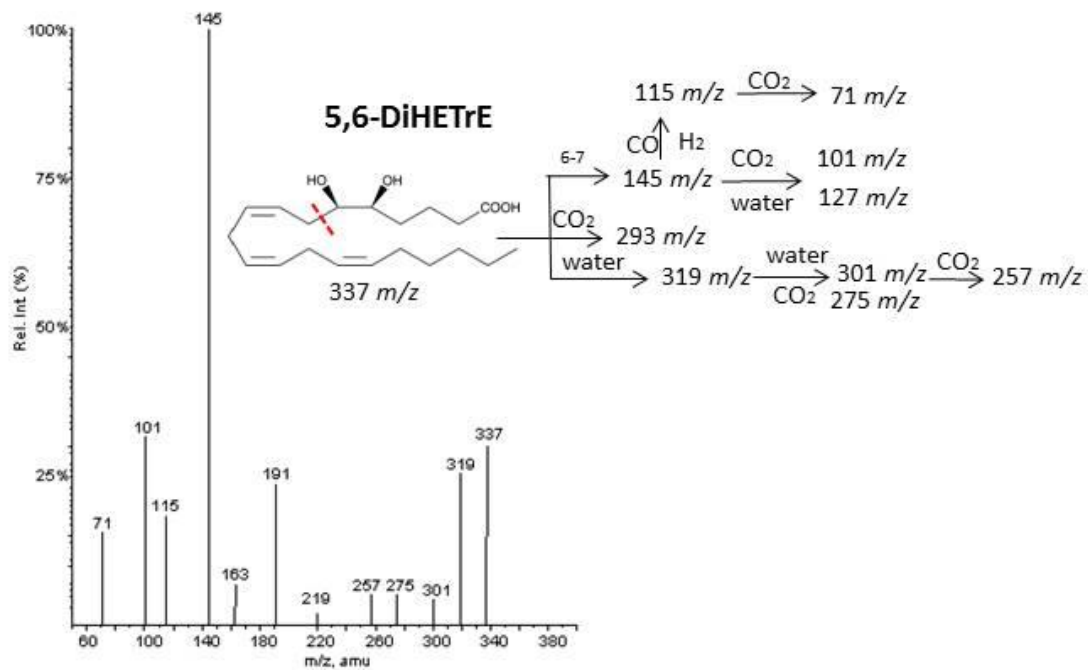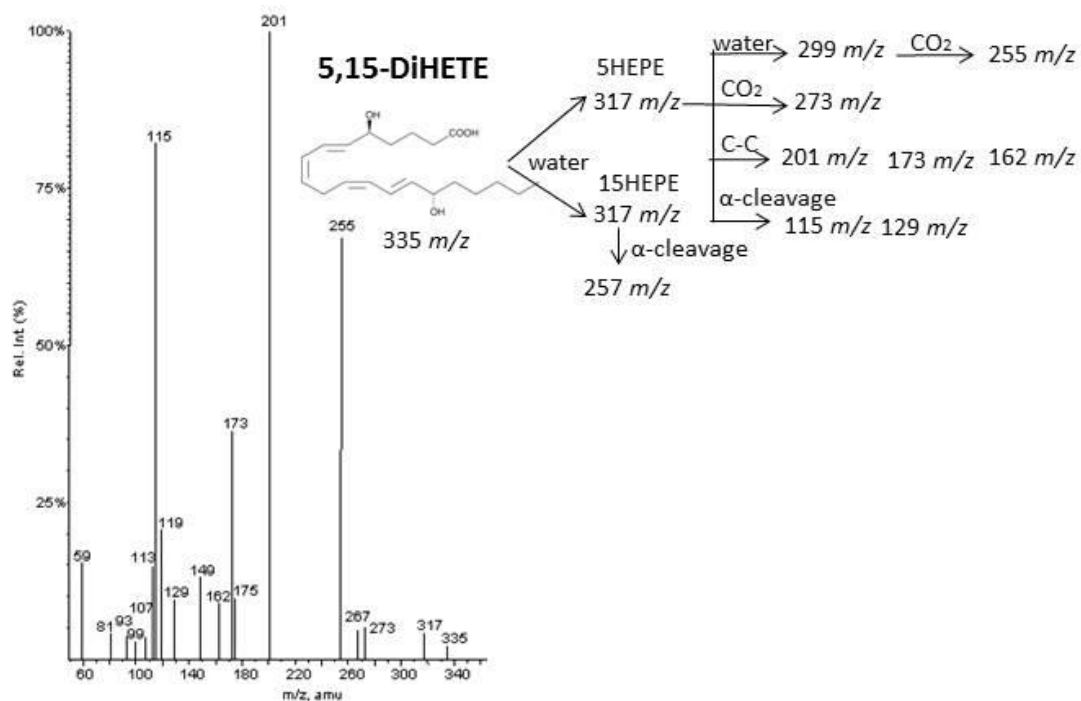

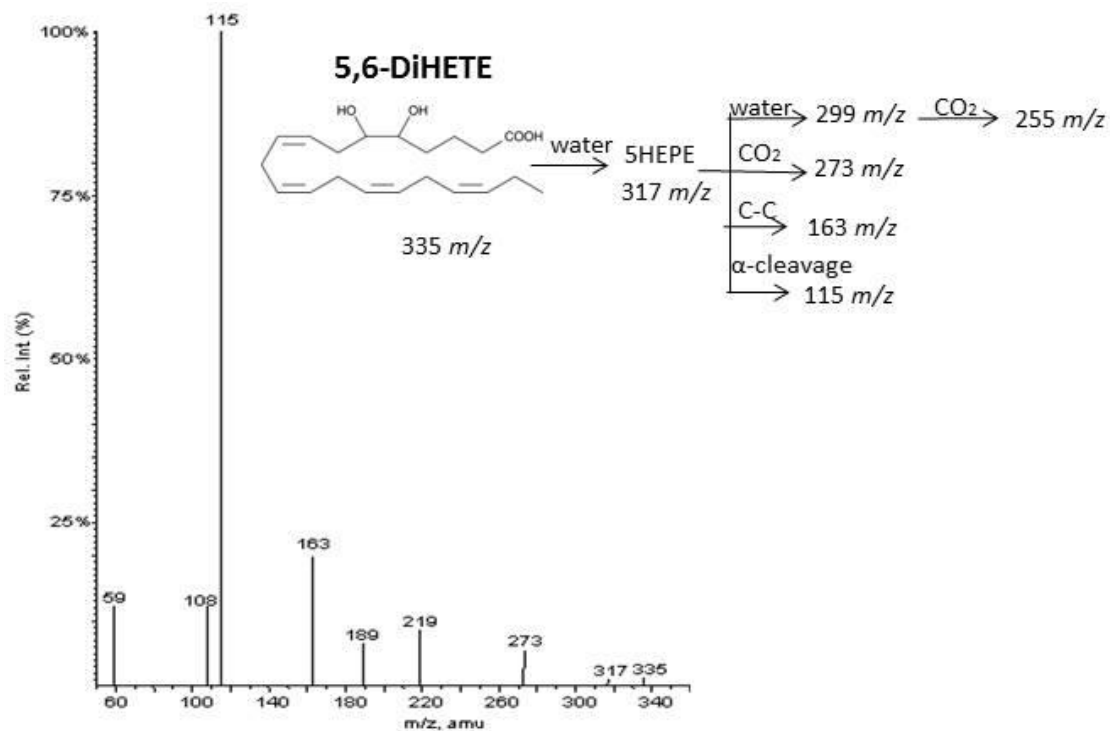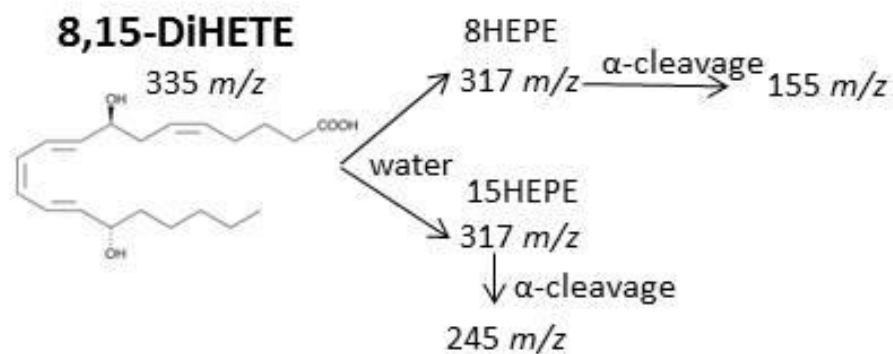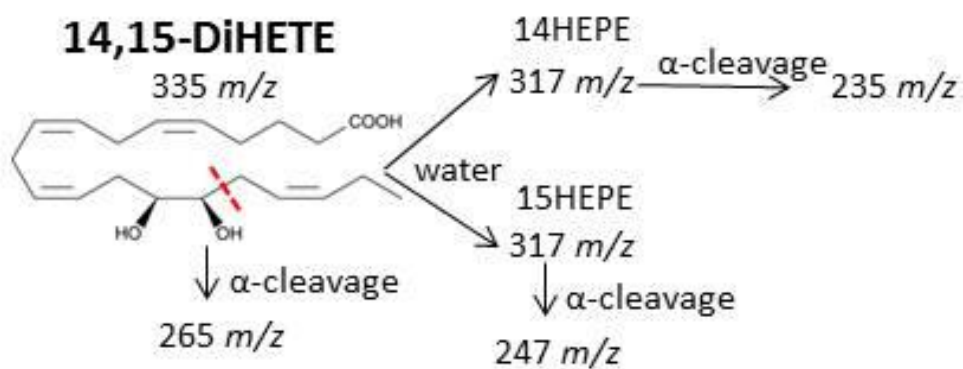

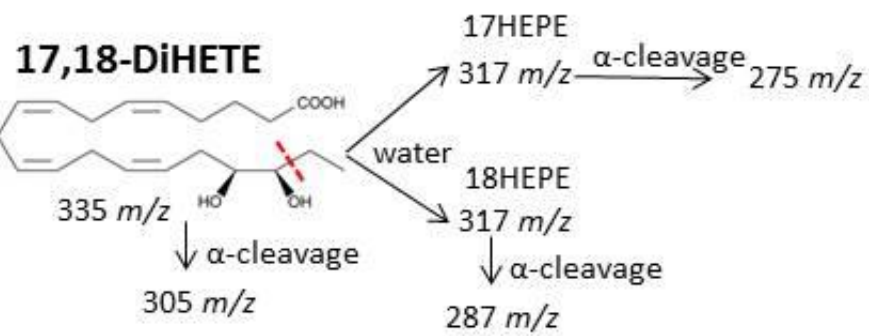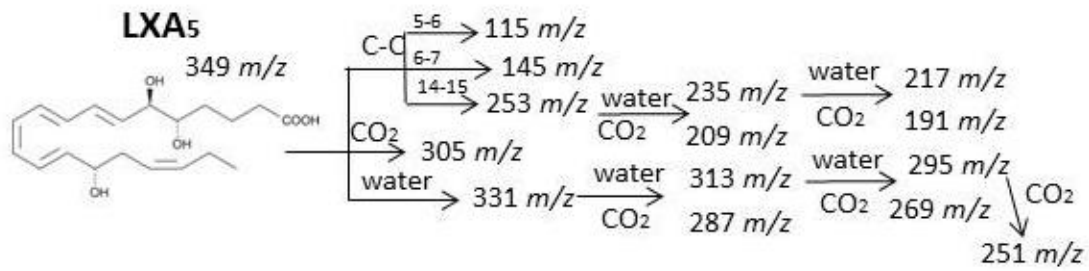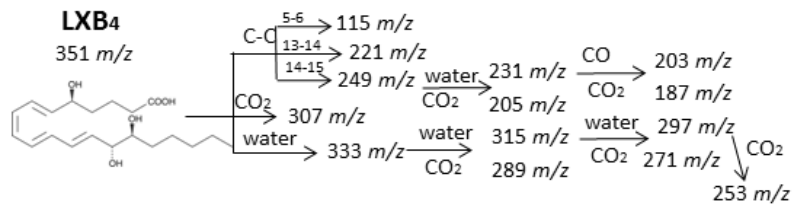

**Supplementary Materials S6:** Fragmentation pattern suggested for EpETrE isomers and LTA<sub>4</sub>. Product ion spectrum at  $m/z$  319 were obtained from database of *LIPID MAPS* at CID 30V, and  $m/z$  317 was obtained from Murphy et al [33].

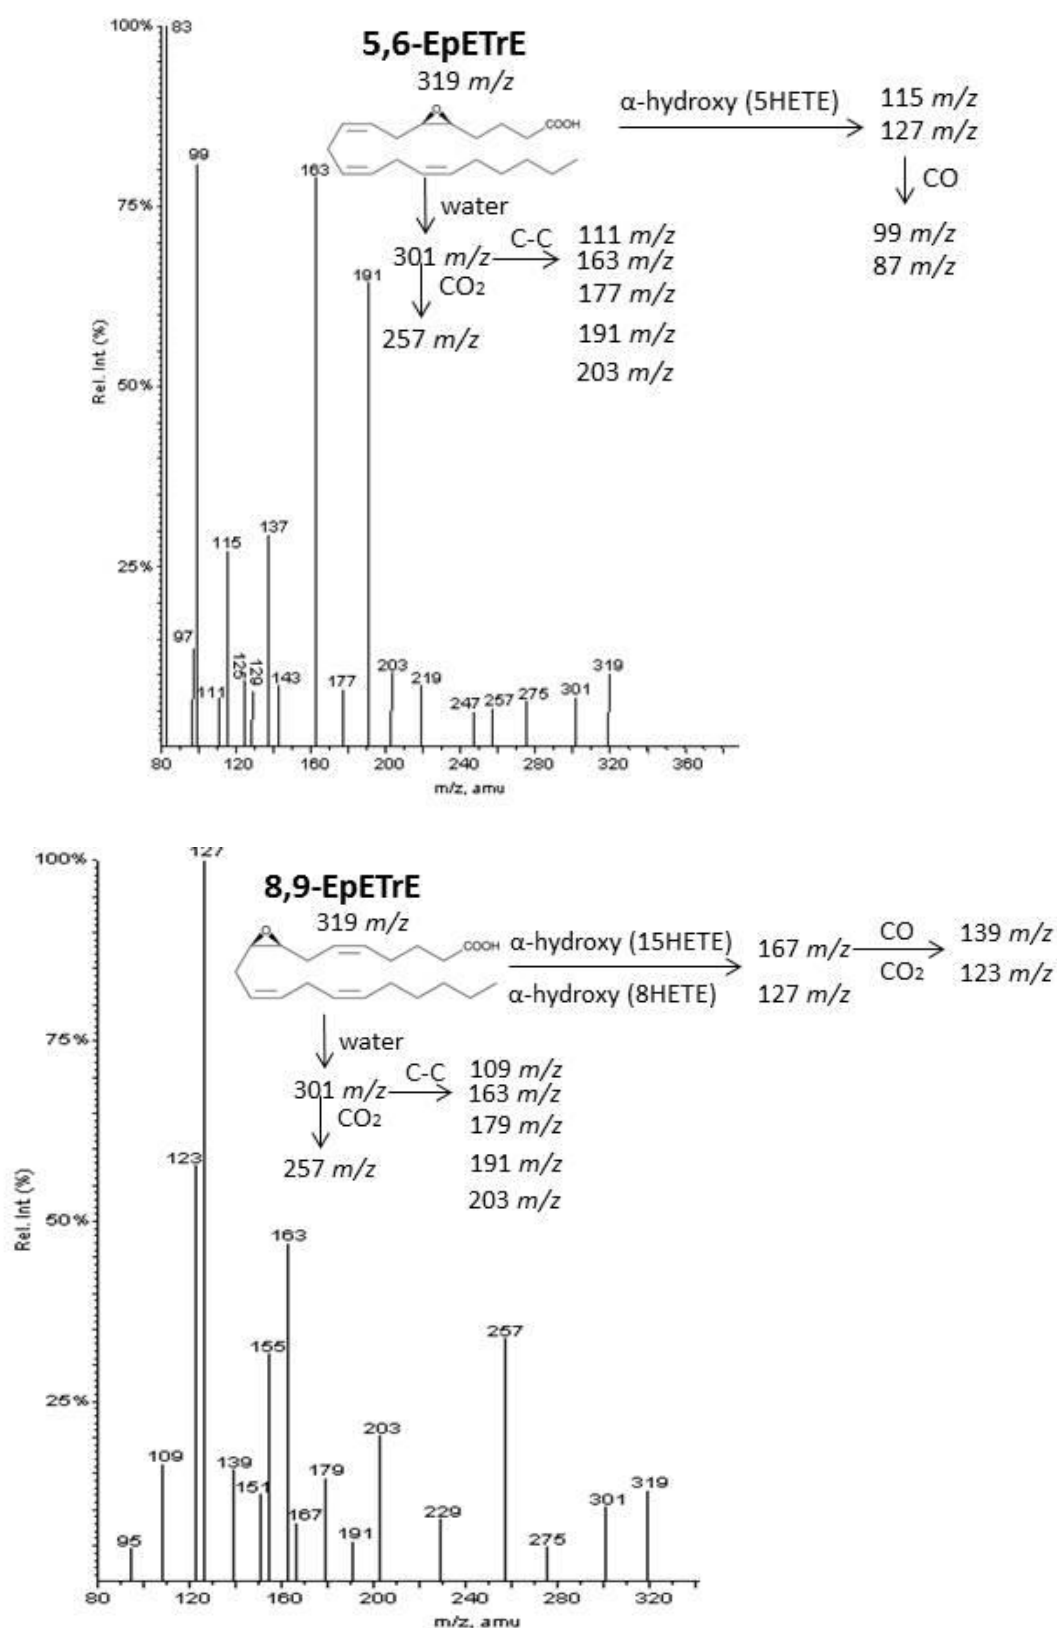

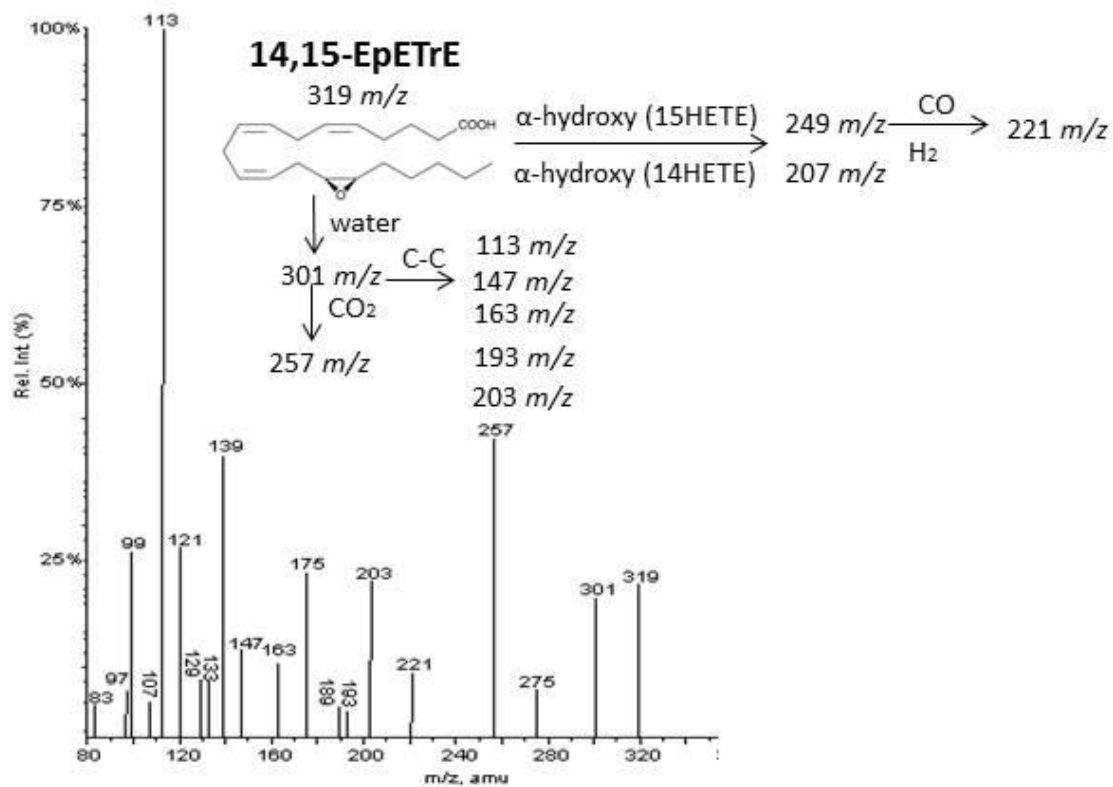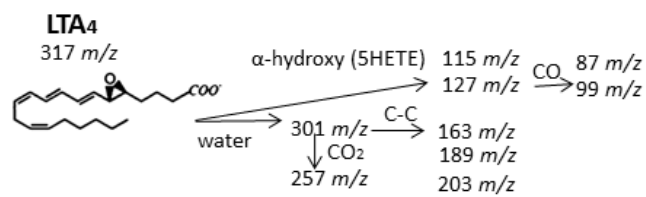

**Supplementary Materials S7:** Fragmentation pattern suggested for several keto-PGs. Product ion spectrum at  $m/z$  349,  $m/z$  351,  $m/z$  353,  $m/z$  367, and  $m/z$  369 were obtained from database of *LIPID MAPS* at CID 30V.

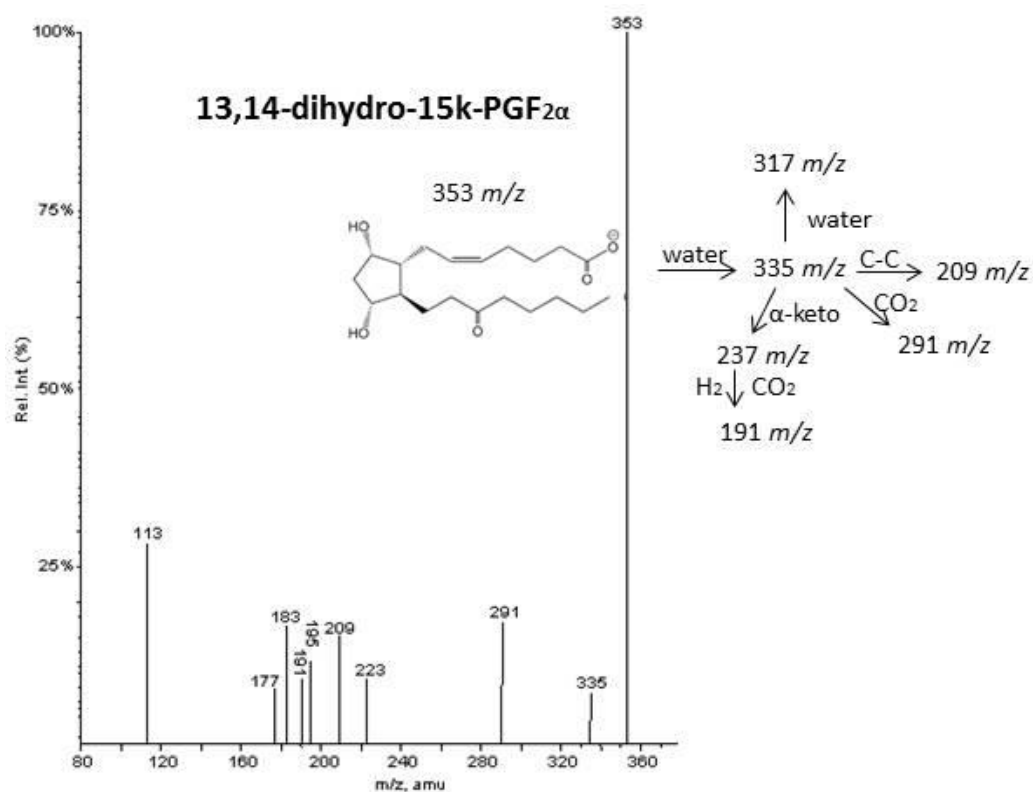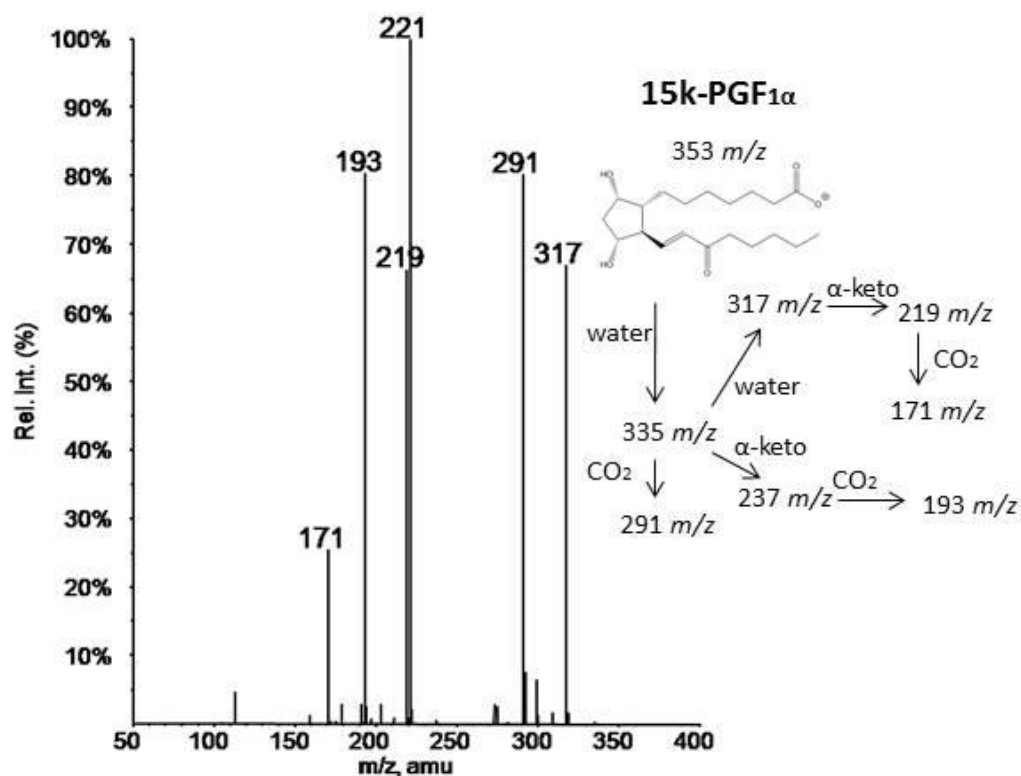

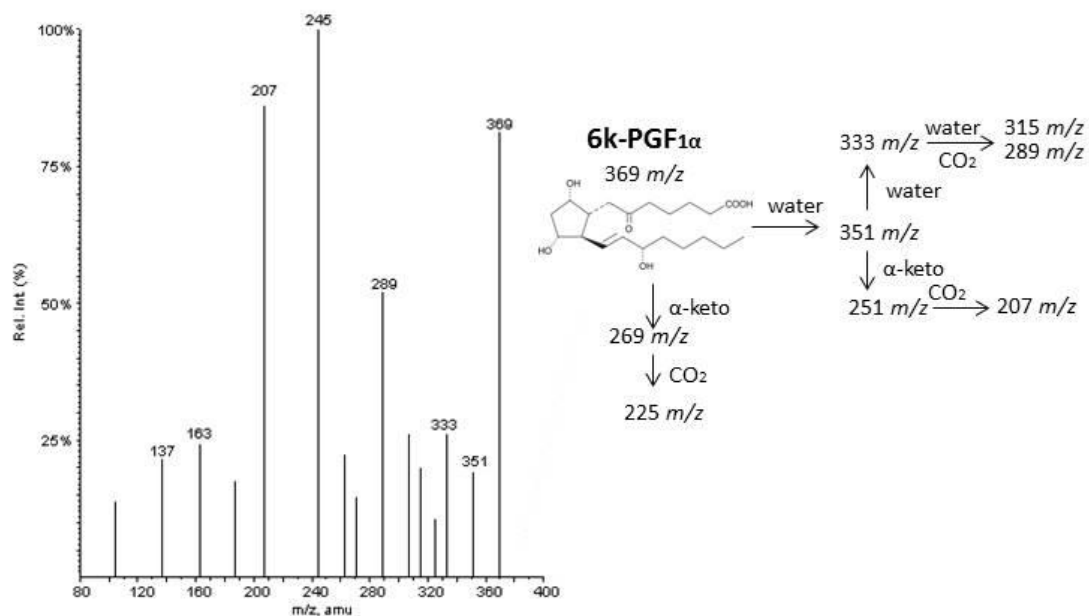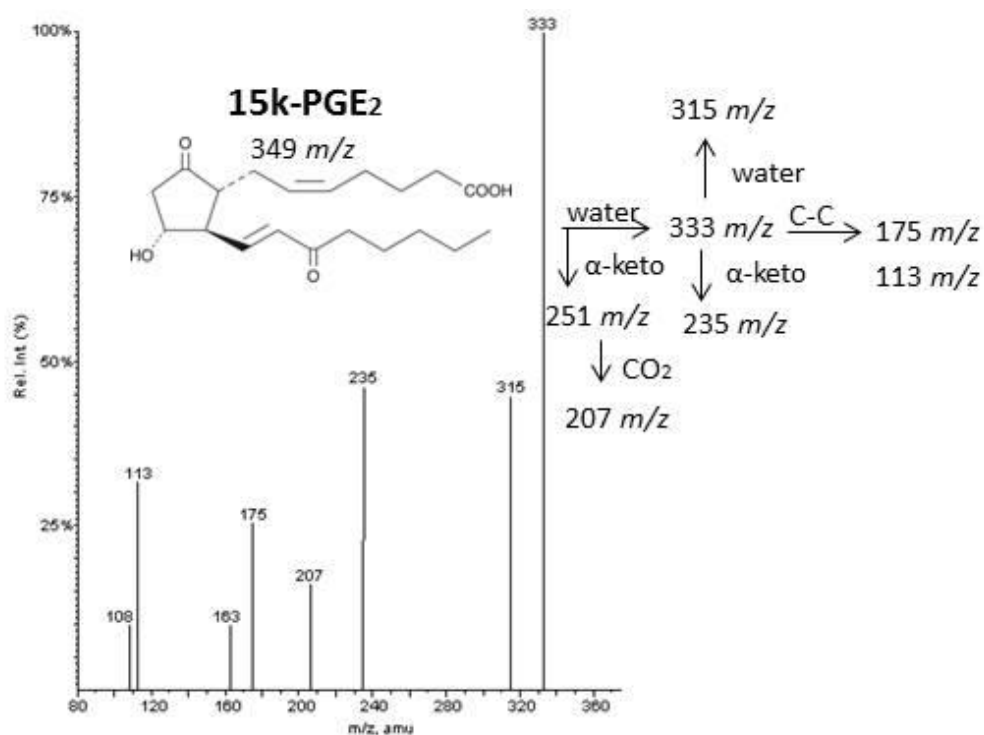

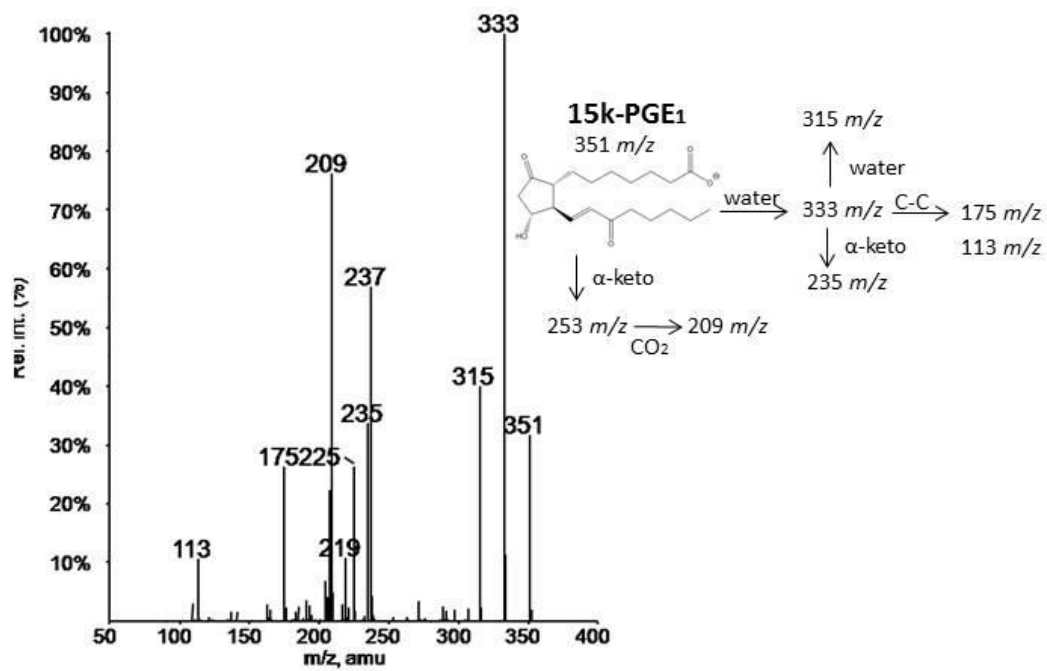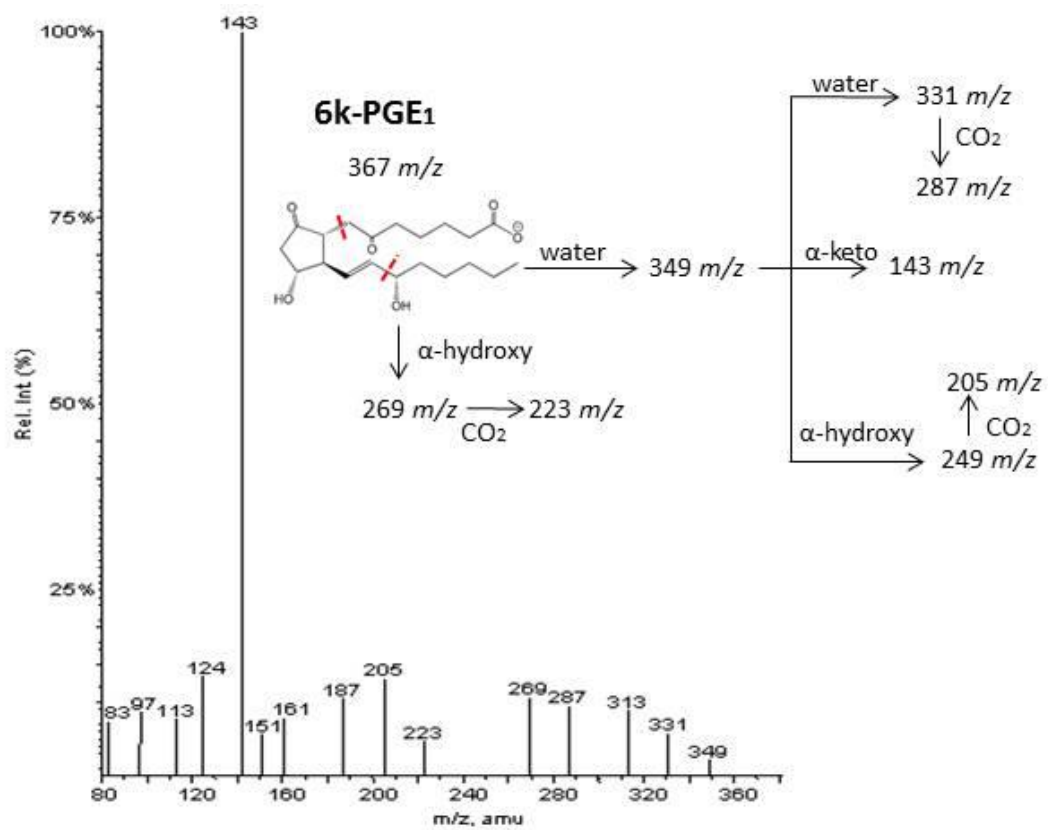



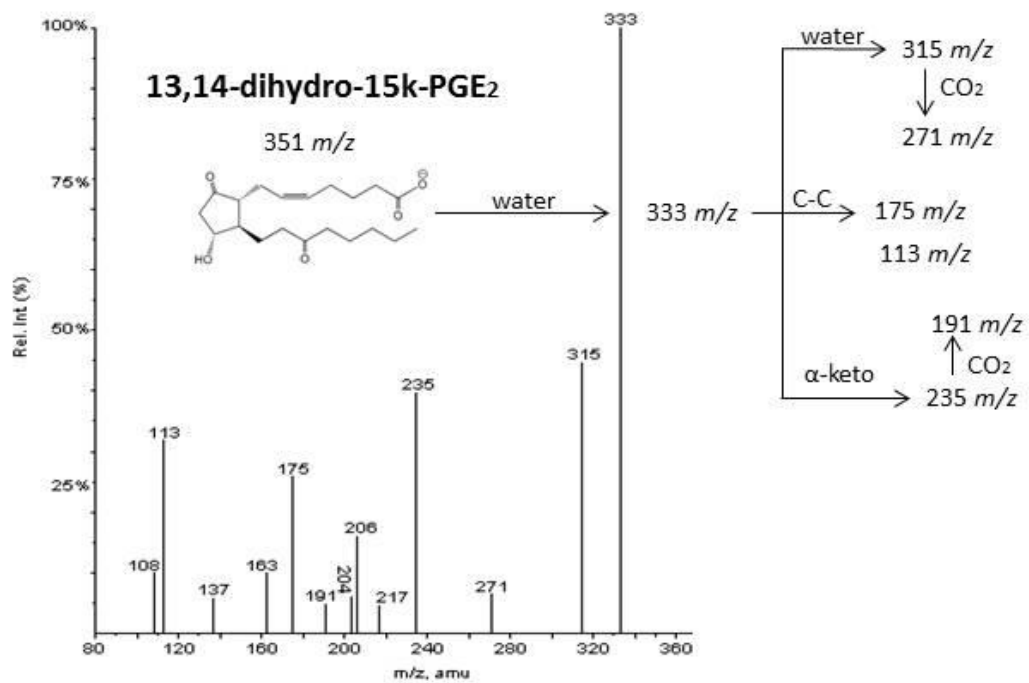

**Supplementary Materials S8:** Fragmentation pattern suggested for TXB<sub>2</sub> and TXA<sub>2</sub>. The product ion spectrum at and  $m/z$  369 was obtained from *LIPID MAPS* at CID 30V. Characteristic MS/MS transitions were suggested for TXA<sub>2</sub> based on lipid structure.

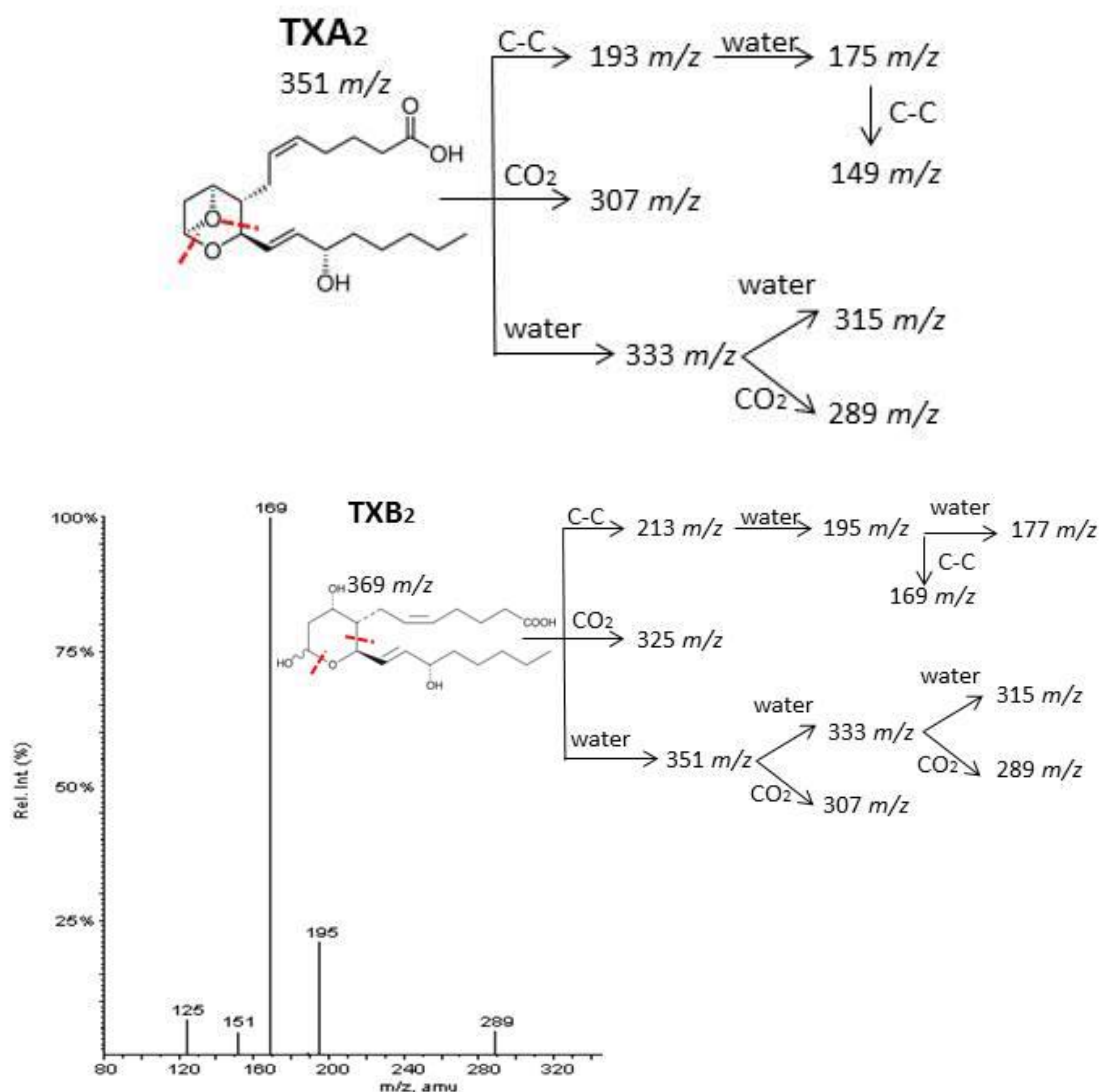

Supplement: s1 [file s1]
